# Supplementary material for: A Convenient Synthesis of (16S,20S)-3β-Hydroxy-5α-pregnane-20,16-carbolactam and Its N-alkyl Derivatives
Source: Molecules. 2020 May 20;25(10):2377. doi: 10.3390/molecules25102377 (PMC7287600; doi:10.3390/molecules25102377)
Supplement: Supplementary file 1 [file molecules-25-02377-s001.pdf]

# Supplementary Materials for

## A convenient synthesis of (16*S*,20*S*)-3 $\beta$ -hydroxy-5 $\alpha$ -pregnane-20,16-carbolactam and its *N*-alkyl derivatives

Agnieszka Wojtkielewicz\*, Damian Pawelski, Przemysław Bazydło, Aneta Baj, Stanisław Witkowski, and Jacek W. Morzycki

Institute of Chemistry, University of Białystok, K. Ciołkowskiego 1K, 15-245 Białystok, Poland; a.wojtkielewicz@uwb.edu.pl (A.W.); d.pawelski@uwb.edu.pl (D.P.); bazydlo\_przemyslaw@wp.pl (P.B.) aneta.baj@uwb.edu.pl (A.B.); wit@uwb.edu.pl (S.W.); morzycki@uwb.edu.pl (J.W.M.)

\*Correspondence: a.wojtkielewicz@uwb.edu.pl; Tel.: +48-85-738-8043

### *Table of contents*

1. Experimental procedures for synthesis of (16*S*,20*S*)-3 $\beta$ -*t*-butyldimethylsilyloxy-5 $\alpha$ -pregnane-20,16-carbolactone (**1b**) from tigogenin.....S2
2. Spectra (<sup>1</sup>H NMR, <sup>13</sup>C NMR) of compounds **2b** - **5b**.....S3-S32

**Experimental procedures for (16*S*,20*S*)-3β-*t*-butyldimethylsilyloxy-5α-pregnane-20,16-carbolactone (**1b**) synthesis from tigogenin**

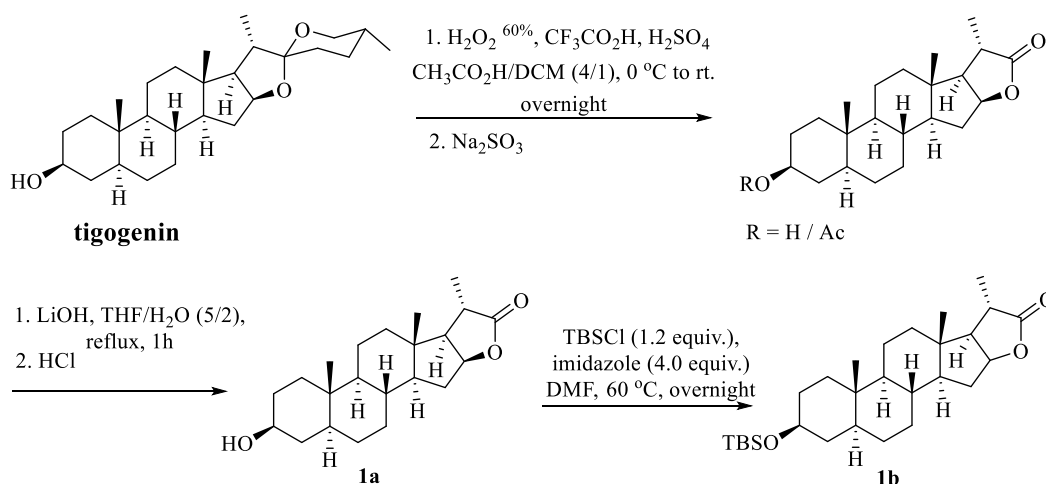

Trifluoroacetic acid (1 mL) and concentrated sulphuric acid (10 mL) were added to the mixture of tigogenin (10 g, 0.024 mol), molecular iodine (0.5 g, 0.002 mol), *n*-Bu<sub>4</sub>NBr (0.100 g, 3 × 10<sup>-4</sup> mol), acetic acid (120 mL) in DCM (30 mL). The multi-component solution was heated at 50 °C for 1 hour, then, after cooling to 0 °C, 60% aqueous solution of H<sub>2</sub>O<sub>2</sub> (20 mL, 0.438 mol, 18.2 equiv.) was slowly added. After 1 h, the ice bath was removed and stirring was continued at room temperature overnight. The progress of the reaction was monitored by TLC. After completion of the reaction, a saturated aqueous Na<sub>2</sub>SO<sub>3</sub> solution was carefully added to the mixture (ca. 300 mL). Stirring was continued until the purple colour of the mixture disappeared. After that, the resulting yellow solution was neutralized with 50% aqueous NaOH solution to pH 7 (ca. 120 mL). Product was extracted with DCM (5 × 30 mL). The combined organic layers were concentrated under reduced pressure. Then, LiOH (2.874, 0.120 mol) and a THF/H<sub>2</sub>O (5/2) mixture (200 mL) were added to the residue. The resulting suspension was heated at reflux. The progress of saponification was monitored by TLC. After about 1 hour, the solution was acidified with 12 N HCl to pH 3 and stirring was continued for approx.. 10 min at 80 °C. After cooling, THF was evaporated under reduced pressure. The residue was diluted with water (200 mL) and product was extracted with AcOEt (5 × 20 mL). The combined organic layers were dried over anhydrous Na<sub>2</sub>SO<sub>4</sub>, filtered and the solvent was concentrated under reduced pressure. The crude product was purified by crystallization from AcOEt. (16*S*,20*S*)-3β-Hydroxy-5α-pregnane-20,16-carbolactone (**1a**) was obtained as a white crystalline material (7.591 g, 91%).

(16*S*,20*S*)-3β-*t*-Butyldimethylsilyloxy-5α-pregnane-20,16-carbolactone (**1b**) was obtained in 95% (6.321 g) from (16*S*,20*S*)-3β-hydroxy-23,24-bis-norcholano-22,16-lactone (**1a**, 5 g, 0.014 mol, 1.0 equiv.) according to a standard procedure using imidazole (3.93 g, 0.058 mol, 4 equiv.), TBSCl (2.61 g, 0.017 mol, 1.2 equiv.) in anhydrous DMF (200 mL).

Spectra ( $^1\text{H}$  NMR,  $^{13}\text{C}$  NMR) of compounds **2b** - **5b**

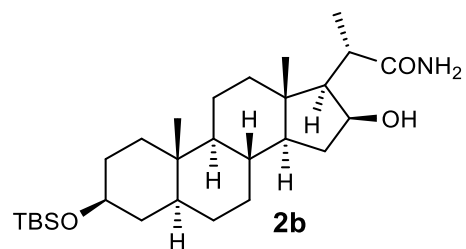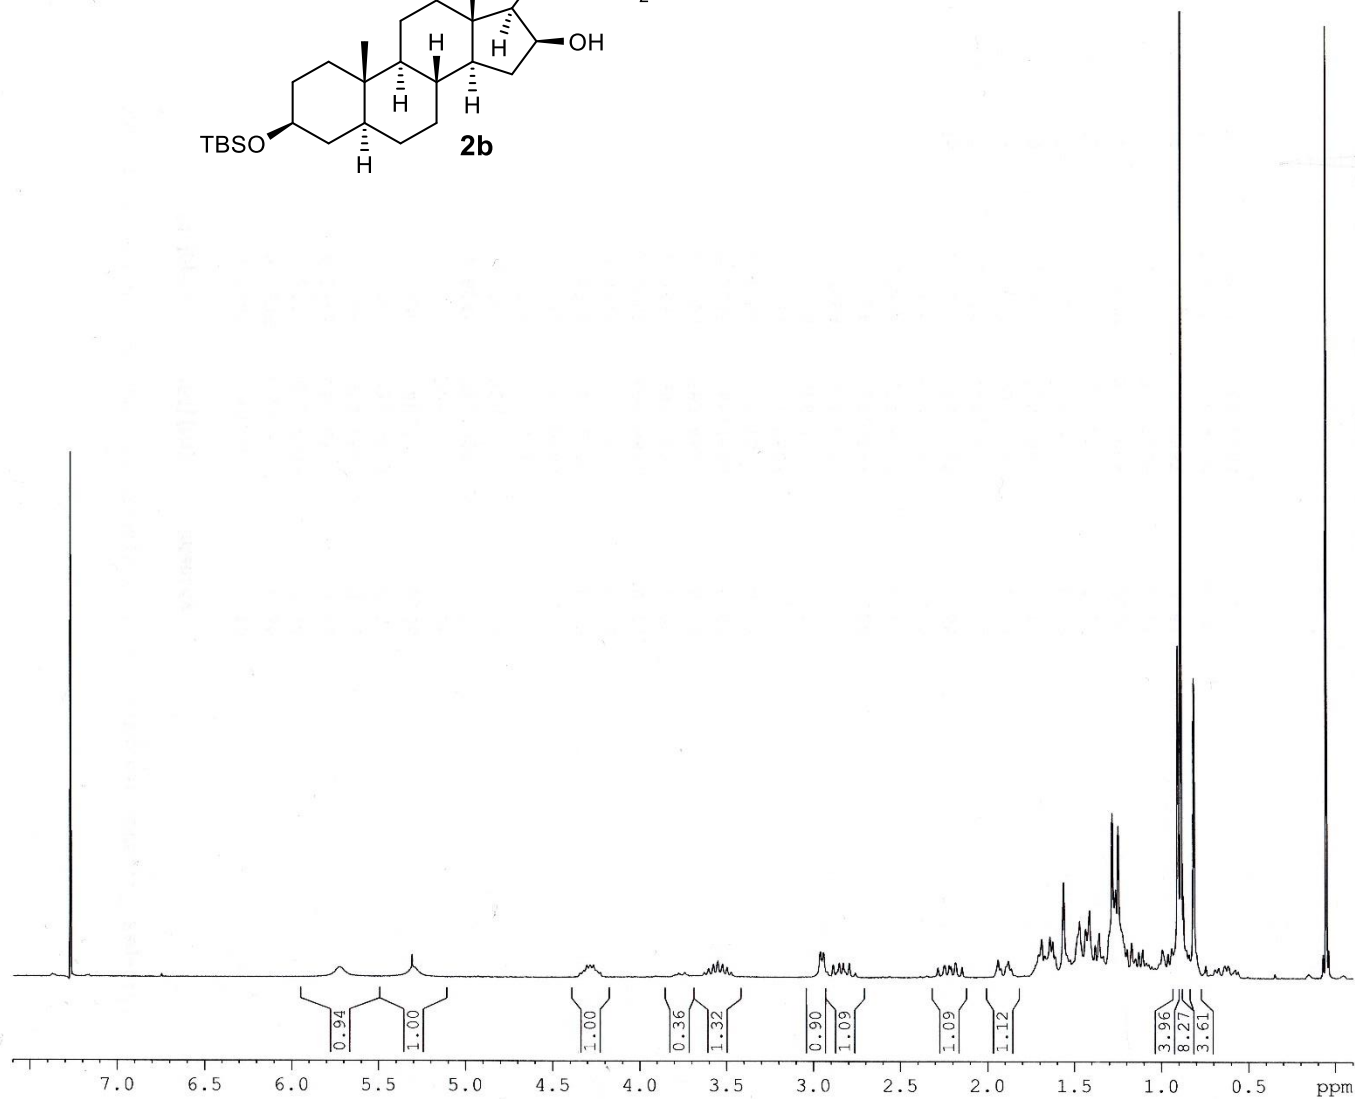

Current Data Parameters  
NAME PB G138(I)  
EXPNO 1  
PROCNO 1

F2 - Acquisition Parameters  
Date 20190417  
Time 15.05  
INSTRUM spect  
PROBHD 5 mm Dual 13C/  
PULPROG zg30  
TD 32768  
SOLVENT CDC13  
NS 192  
DS 0  
SWH 4139.073 Hz  
FIDRES 0.126314 Hz  
AQ 3.9584243 sec  
RG 912.3  
DW 120.800 usec  
DE 8.00 usec  
TE 300.0 K  
D1 1.00000000 sec  
TD0 1

===== CHANNEL f1 =====  
NUC1 1H  
P1 20.00 usec  
PL1 -5.00 dB  
SFO1 200.1312359 MHz

F2 - Processing parameters  
SI 32768  
SF 200.1300000 MHz  
WDW GM  
SSB 0  
LB -0.20 Hz  
GB 0.2  
PC 1.00

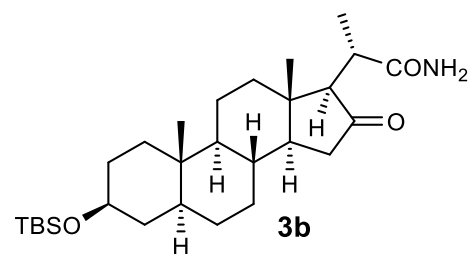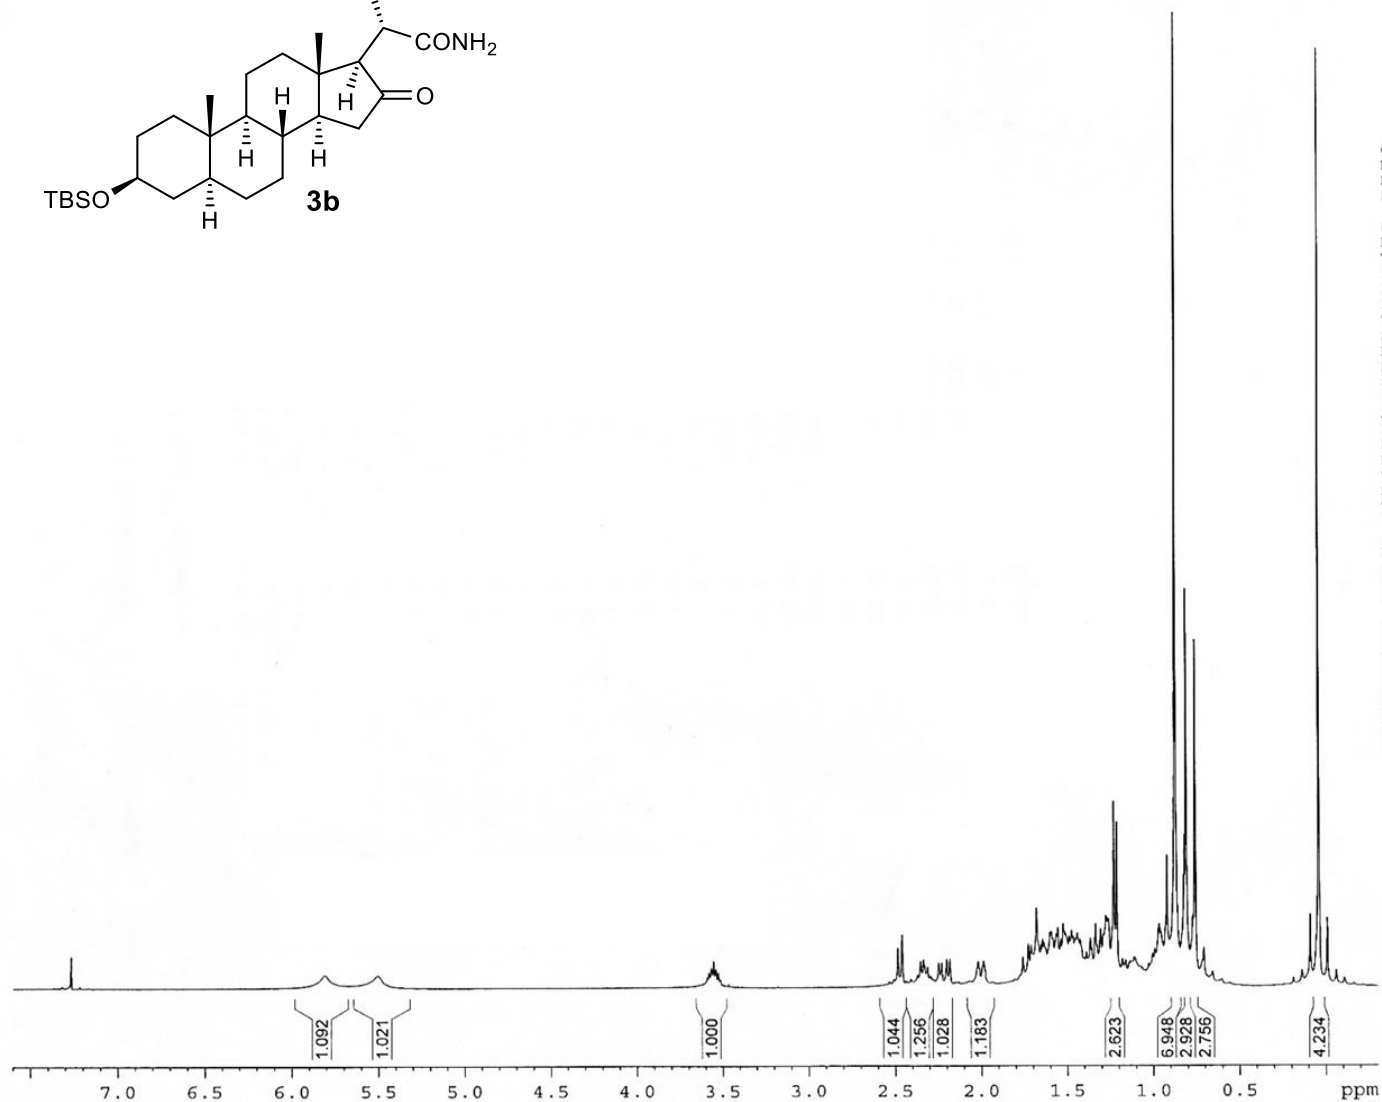

Current Data Parameters  
 NAME PB 59 oksoamid  
 EXPNO 1  
 PROCNO 1

F2 - Acquisition Parameters  
 Date\_ 20190911  
 Time 13.45  
 INSTRUM spect  
 PROBHD 5 mm PABBO BB-  
 PULPROG zg30  
 TD 65536  
 SOLVENT CDCl3  
 NS 128  
 DS 0  
 SWH 8223.685 Hz  
 FIDRES 0.125483 Hz  
 AQ 3.9846387 sec  
 RG 456  
 DW 60.800 usec  
 DE 8.00 usec  
 TE 999.9 K  
 D1 1.00000000 sec  
 TD0 1

----- CHANNEL f1 -----  
 NUC1 1H  
 P1 11.15 usec  
 PL1 -3.00 dB  
 SFO1 400.1524711 MHz

F2 - Processing parameters  
 SI 32768  
 SF 400.1500007 MHz  
 WDW GM  
 SSB 0  
 LB -0.20 Hz  
 GB 0.2  
 PC 1.00

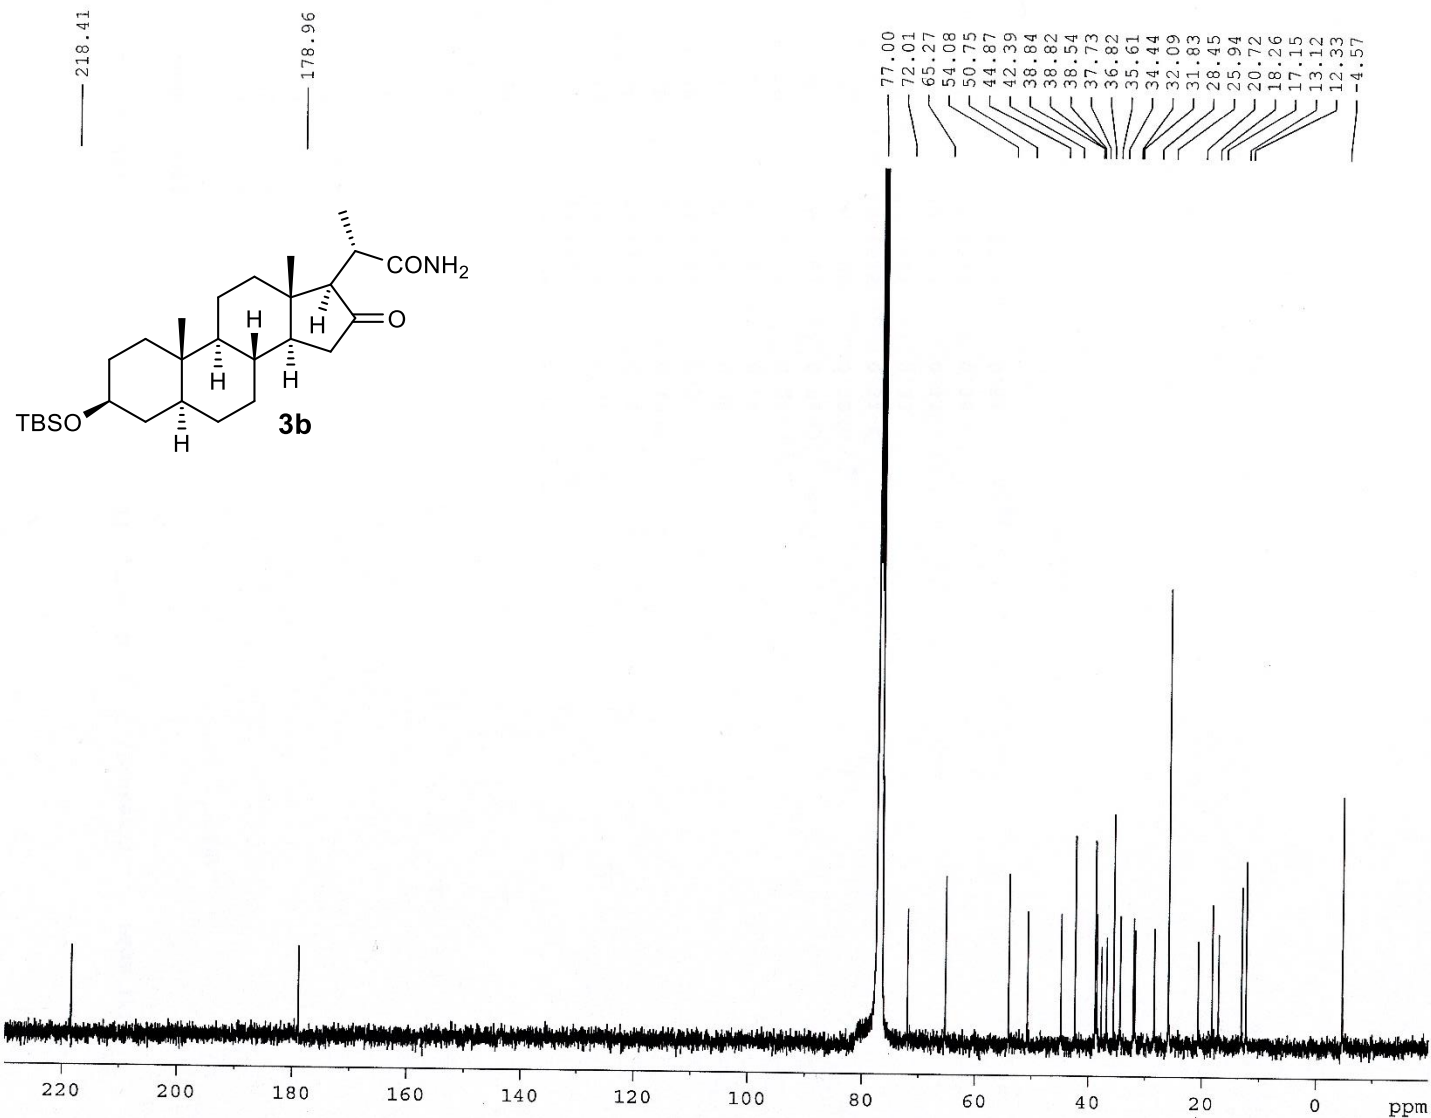

Current Data Parameters  
 NAME AW G32BII' IICC  
 EXPNO 2  
 PROCNO 1

F2 - Acquisition Parameters  
 Date\_ 20190603  
 Time 8.58  
 INSTRUM spect  
 PROBHD 5 mm PABBO BB-  
 PULPROG zgpg30  
 TD 65536  
 SOLVENT CDCl3  
 NS 42000  
 DS 4  
 SWH 32051.281 Hz  
 FIDRES 0.489064 Hz  
 AQ 1.0224116 sec  
 RG 2050  
 DW 15.600 usec  
 DE 6.00 usec  
 TE 999.9 K  
 D1 2.00000000 sec  
 d11 0.03000000 sec  
 DELTA 1.89999998 sec  
 TD0 1

===== CHANNEL f1 =====  
 NUC1 13C  
 P1 27.50 usec  
 PL1 -1.00 dB  
 SFO1 100.6298721 MHz

===== CHANNEL f2 =====  
 CPDPRG2 waltz16  
 NUC2 1H  
 PCPD2 100.00 usec  
 PL2 -3.00 dB  
 PL12 13.65 dB  
 PL13 18.00 dB  
 SFO2 400.1516006 MHz

F2 - Processing parameters  
 SI 32768  
 SF 100.6177984 MHz  
 WDW EM  
 SSB 0  
 LB 1.00 Hz  
 GB 0  
 PC 0.20

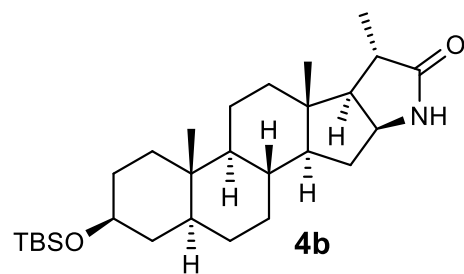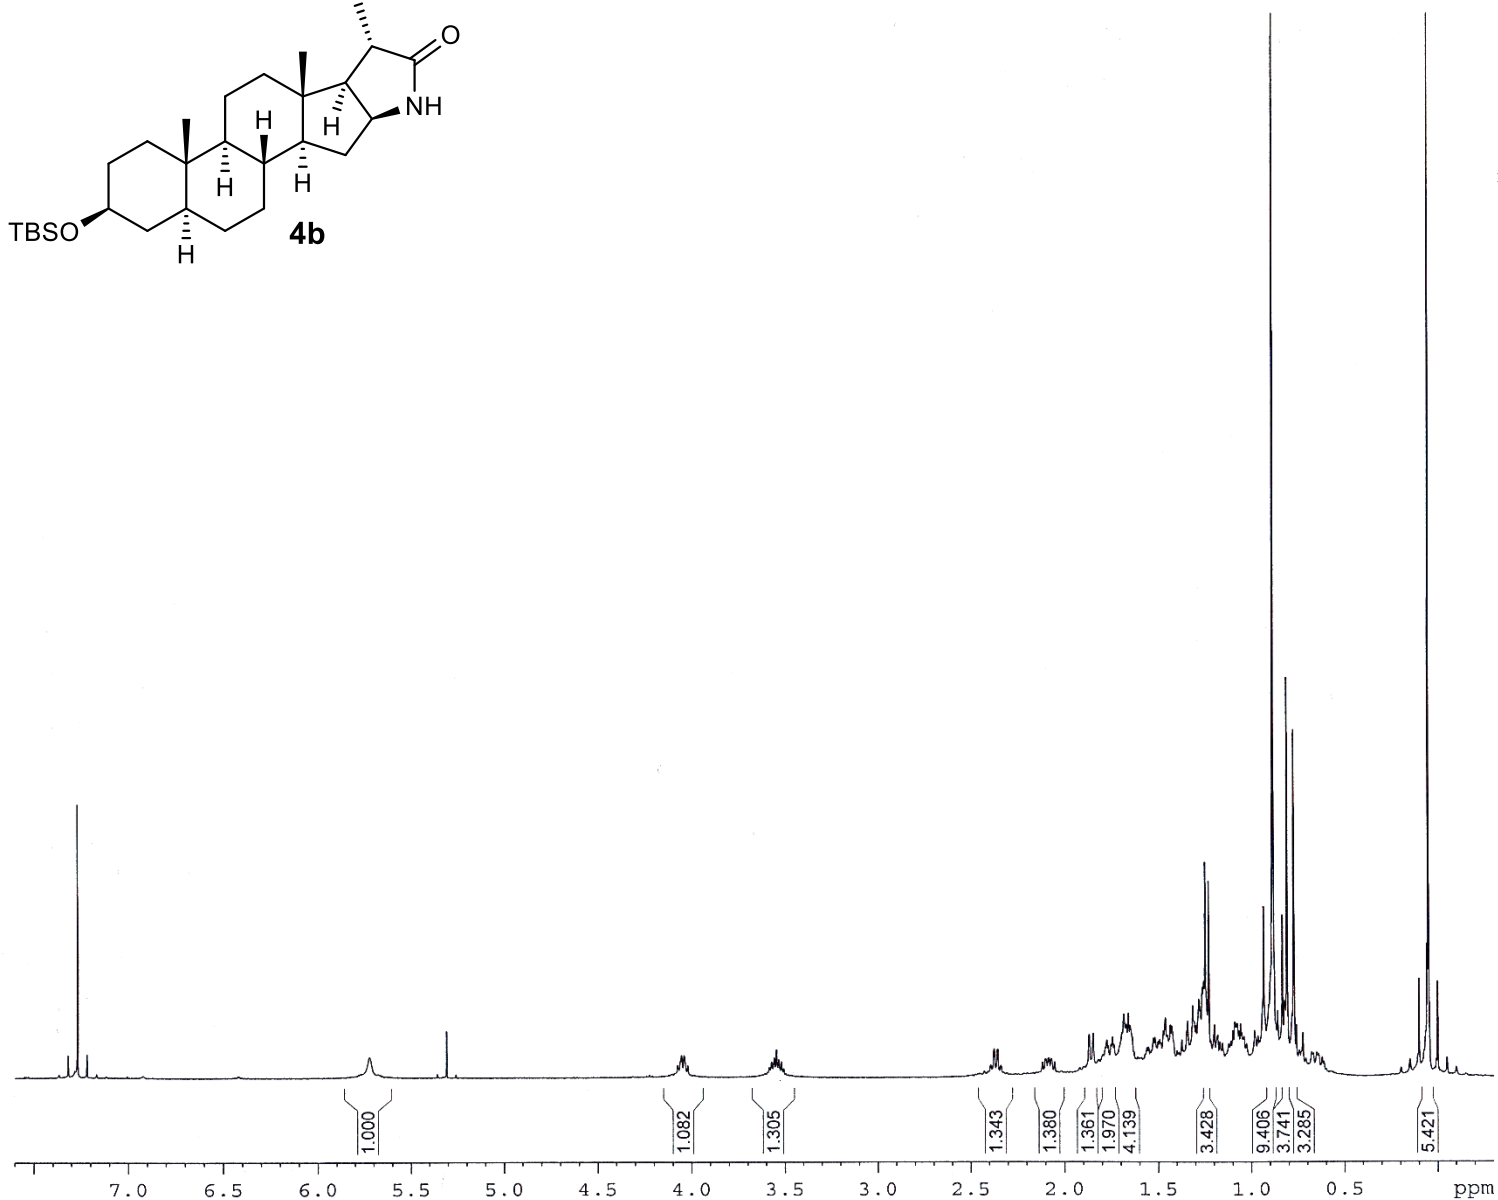

Current Data Parameters  
 NAME PB 63 Laktam cz F4-8  
 EXPNO 1  
 PROCNO 1

F2 - Acquisition Parameters  
 Date\_ 20190927  
 Time 12.43  
 INSTRUM spect  
 PROBHD 5 mm PABBO BB-  
 PULPROG zg30  
 TD 65536  
 SOLVENT CDCl3  
 NS 192  
 DS 0  
 SWH 8223.685 Hz  
 FIDRES 0.125483 Hz  
 AQ 3.9846387 sec  
 RG 203  
 DW 60.800 usec  
 DE 8.00 usec  
 TE 999.9 K  
 D1 1.00000000 sec  
 TD0 1

===== CHANNEL f1 =====  
 NUC1 1H  
 P1 25.00 usec  
 PL1 -3.00 dB  
 SFO1 400.1524711 MHz

F2 - Processing parameters  
 SI 32768  
 SF 400.1500007 MHz  
 WDW GM  
 SSB 0  
 LB -0.20 Hz  
 GB 0.2  
 PC 1.00

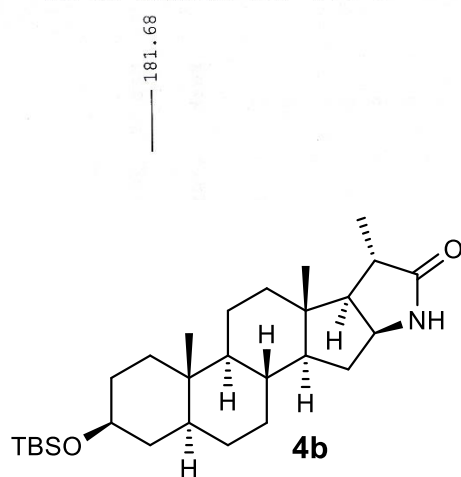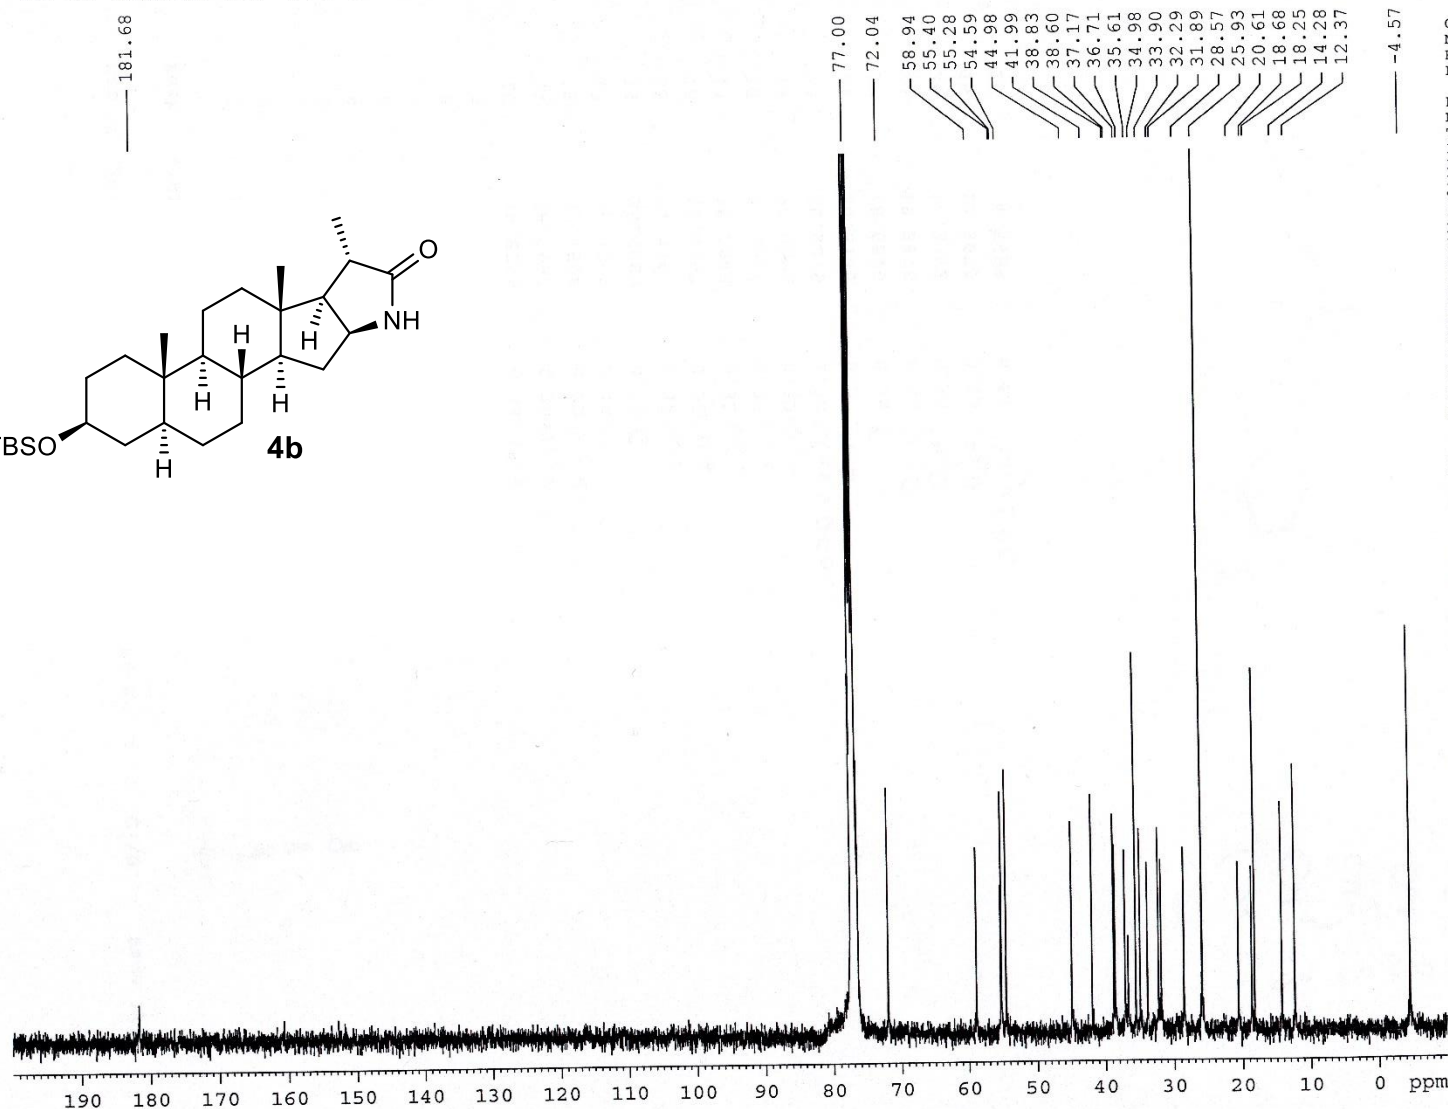

Current Data Parameters  
 NAME PB 63 Laktam cz F4-8  
 EXPNO 2  
 PROCNO 1

F2 - Acquisition Parameters  
 Date\_ 20190929  
 Time 20.53  
 INSTRUM spect  
 PROBHD 5 mm PABBO BB-  
 PULPROG zgpg30  
 TD 65536  
 SOLVENT CDCl3  
 NS 30720  
 DS 4  
 SWH 32051.281 Hz  
 FIDRES 0.489064 Hz  
 AQ 1.0224116 sec  
 RG 287  
 DW 15.600 usec  
 DE 6.00 usec  
 TE 999.9 K  
 D1 2.00000000 sec  
 d11 0.03000000 sec  
 DELTA 1.89999998 sec  
 TD0 1

===== CHANNEL f1 =====  
 NUC1 13C  
 P1 27.50 usec  
 PL1 -1.00 dB  
 SFO1 100.6298721 MHz

===== CHANNEL f2 =====  
 CPDPRG2 waltz16  
 NUC2 1H  
 PCPD2 100.00 usec  
 PL2 -3.00 dB  
 PL12 13.65 dB  
 PL13 18.00 dB  
 SFO2 400.1516006 MHz

F2 - Processing parameters  
 SI 32768  
 SF 100.6177991 MHz  
 WDW EM  
 SSB 0  
 LB 1.00 Hz  
 GB 0  
 PC 0.20

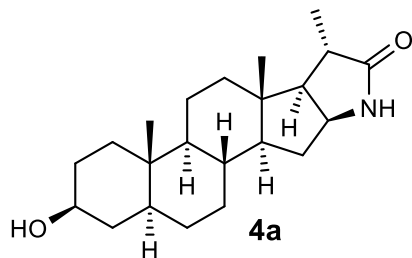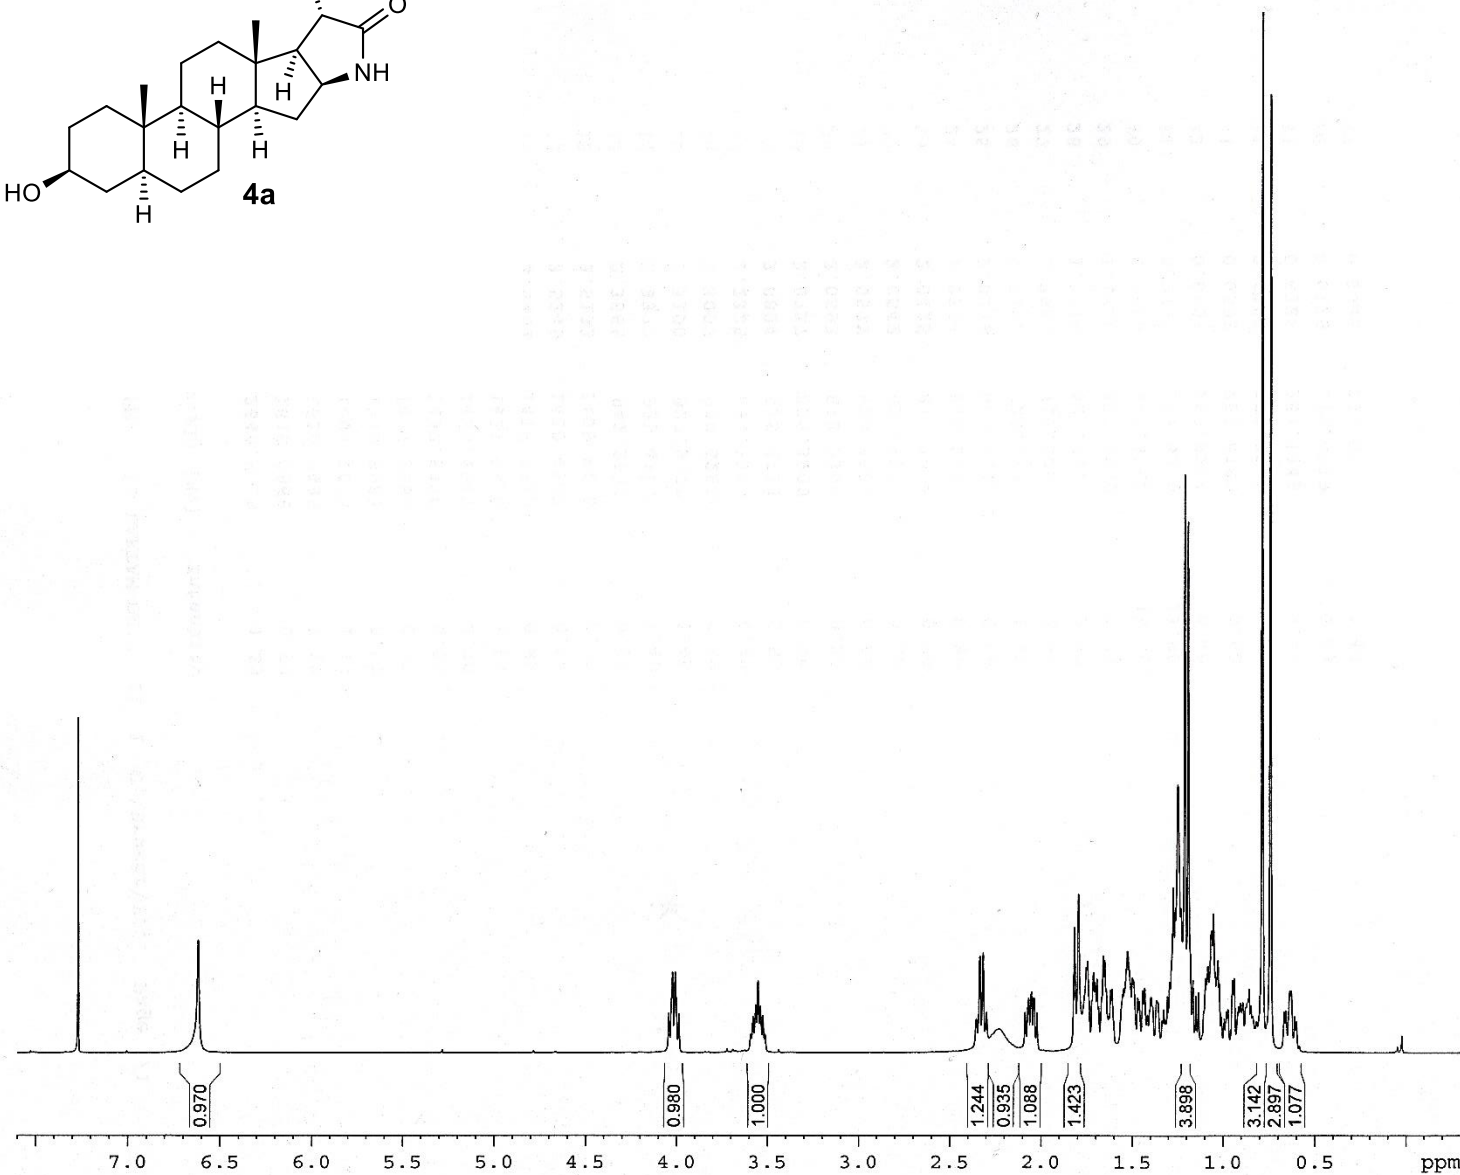

Current Data Parameters  
 NAME PB LAKTAM-OH'  
 EXPNO 11  
 PROCNO 1

F2 - Acquisition Parameters  
 Date\_ 20200310  
 Time 13.05  
 INSTRUM spect  
 PROBHD 5 mm PABBO BB-  
 PULPROG zg30  
 TD 65536  
 SOLVENT CDCl3  
 NS 64  
 DS 0  
 SWH 8223.685 Hz  
 FIDRES 0.125483 Hz  
 AQ 3.9846387 sec  
 RG 90.5  
 DW 60.800 usec  
 DE 8.00 usec  
 TE 296.6 K  
 D1 1.00000000 sec  
 TDO 1

===== CHANNEL f1 =====  
 NUC1 1H  
 P1 11.15 usec  
 PL1 -3.00 dB  
 SFO1 400.1524711 MHz

F2 - Processing parameters  
 SI 32768  
 SF 400.1500007 MHz  
 WDW GM  
 SSB 0  
 LB -0.20 Hz  
 GB 0.2  
 PC 1.00

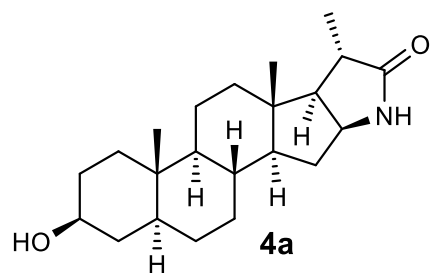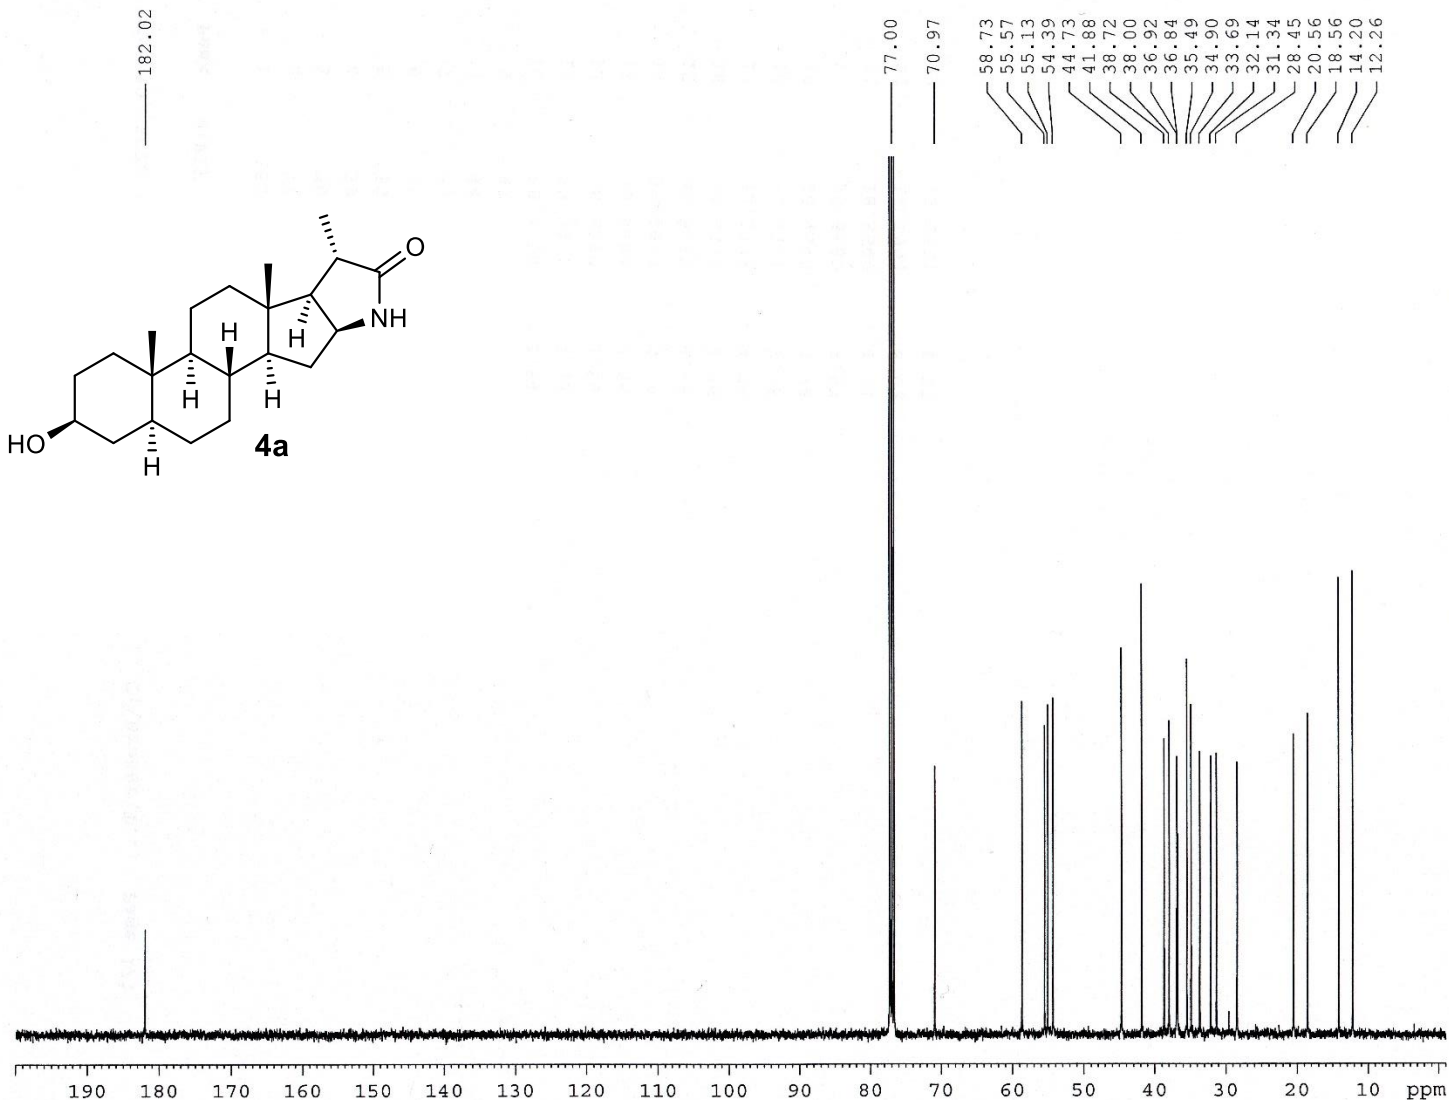

Current Data Parameters  
 NAME PB LAKTAM-OH'  
 EXPNO 2  
 PROCNO 1

F2 - Acquisition Parameters  
 Date\_ 20200310  
 Time\_ 13.14  
 INSTRUM spect  
 PROBHD 5 mm PABBO BB-  
 PULPROG zgpg30  
 TD 65536  
 SOLVENT CDCl3  
 NS 768  
 DS 4  
 SWH 32051.281 Hz  
 FIDRES 0.489064 Hz  
 AQ 1.0224116 sec  
 RG 2050  
 DW 15.600 usec  
 DE 6.00 usec  
 TE 297.0 K  
 D1 2.00000000 sec  
 d11 0.03000000 sec  
 DELTA 1.89999998 sec  
 TD0 1

===== CHANNEL f1 =====  
 NUC1 13C  
 P1 27.50 usec  
 PL1 -1.00 dB  
 SFO1 100.6298721 MHz

===== CHANNEL f2 =====  
 CPDPRG2 waltz16  
 NUC2 1H  
 PCPD2 100.00 usec  
 PL2 -3.00 dB  
 PL12 13.65 dB  
 PL13 18.00 dB  
 SFO2 400.1516006 MHz

F2 - Processing parameters  
 SI 32768  
 SF 100.6178053 MHz  
 WDW EM  
 SSB 0  
 LB 1.00 Hz  
 GB 0  
 PC 0.20

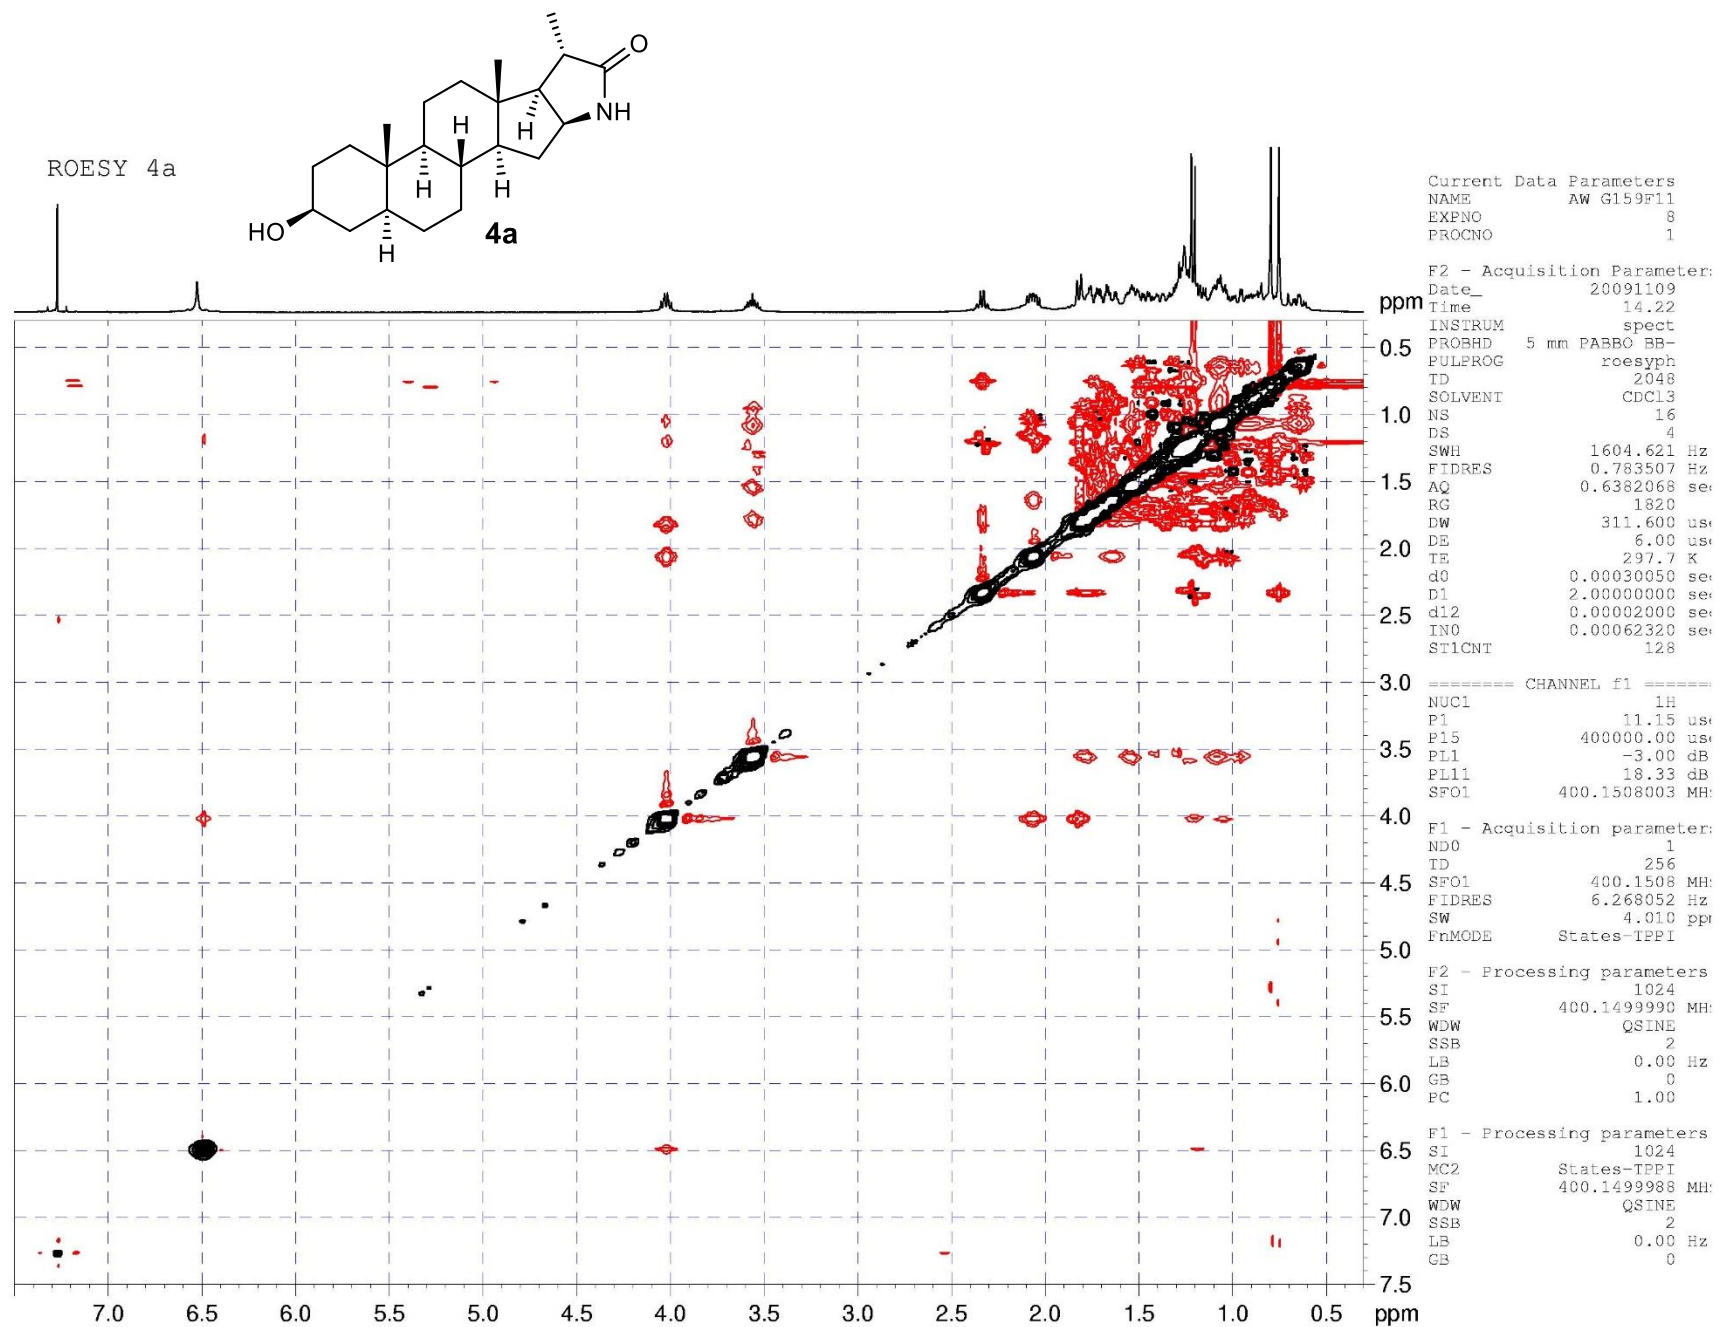

ROESY 4a

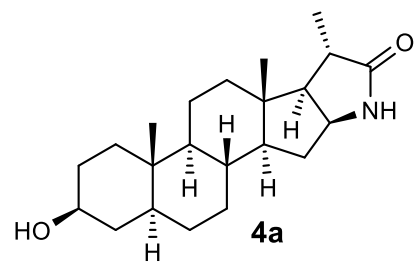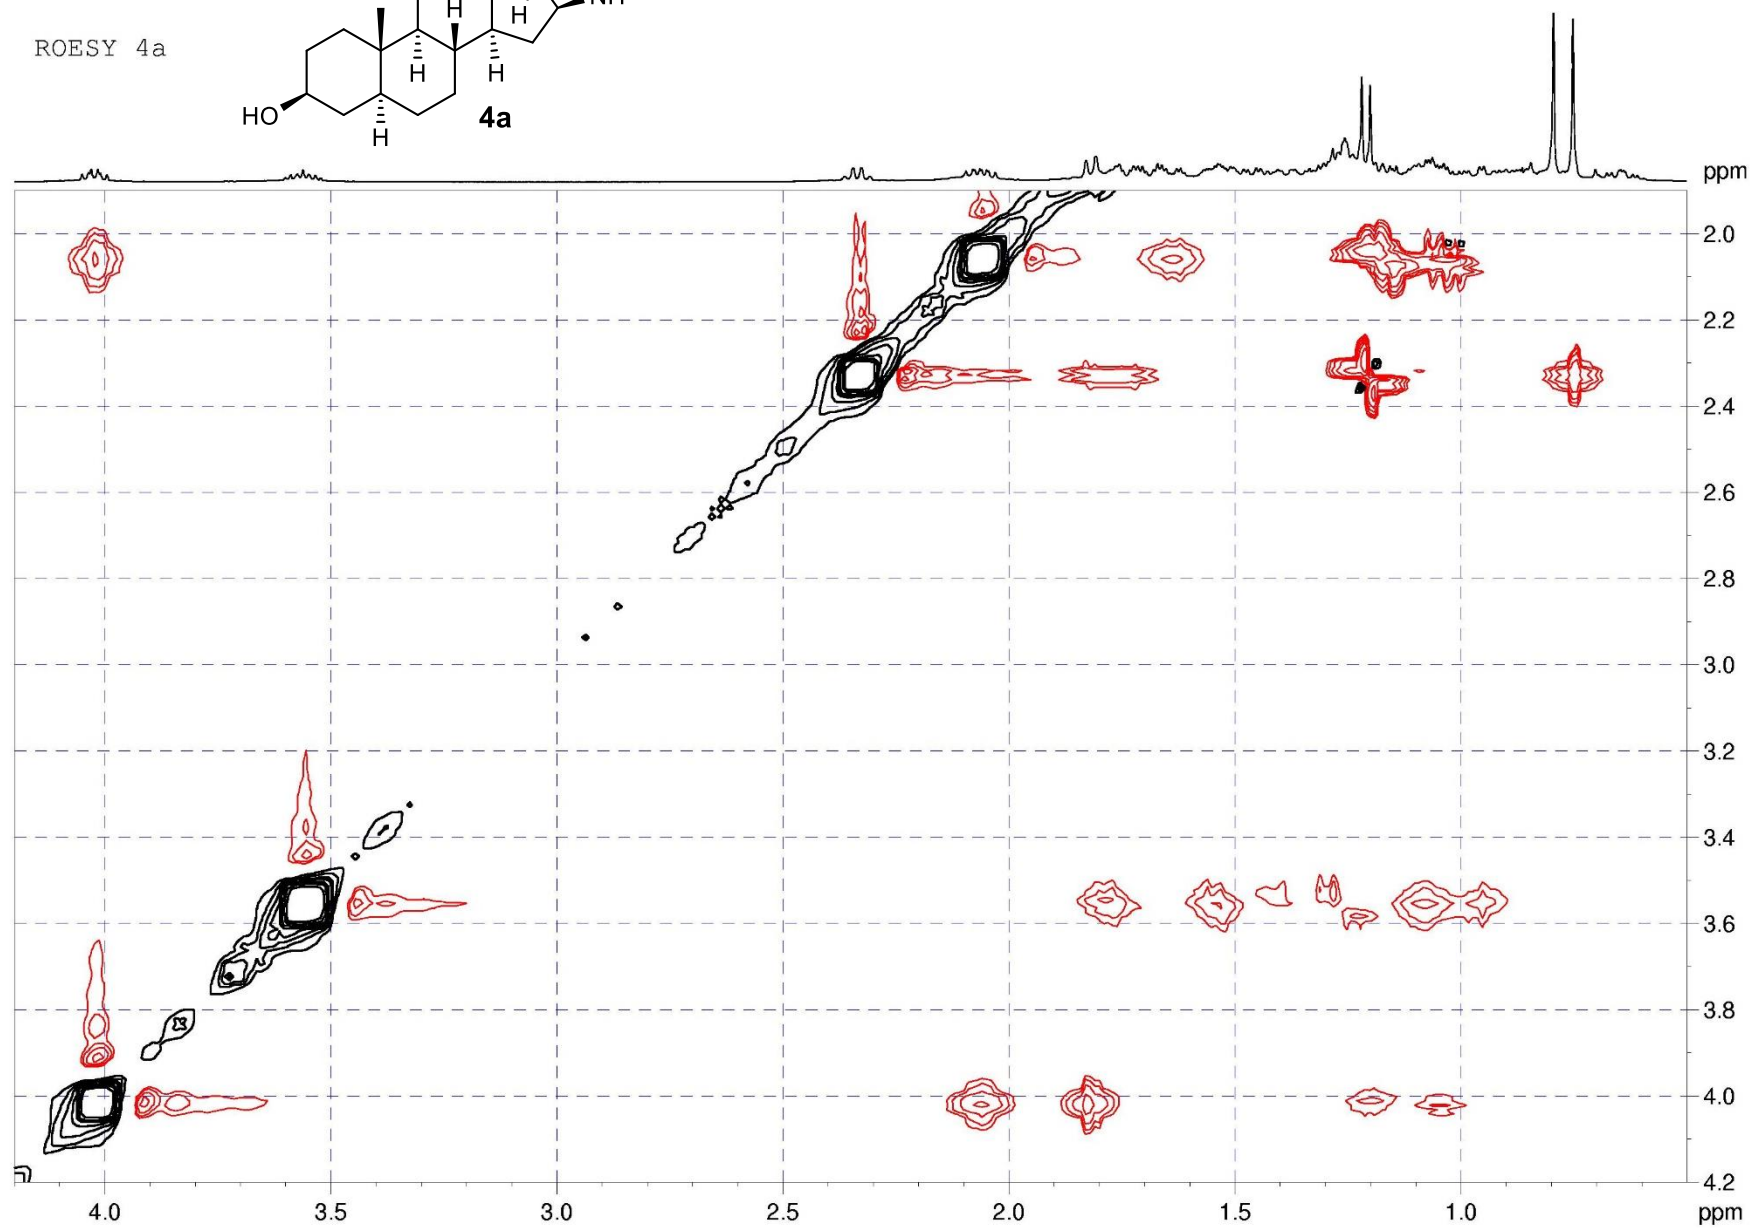

S12

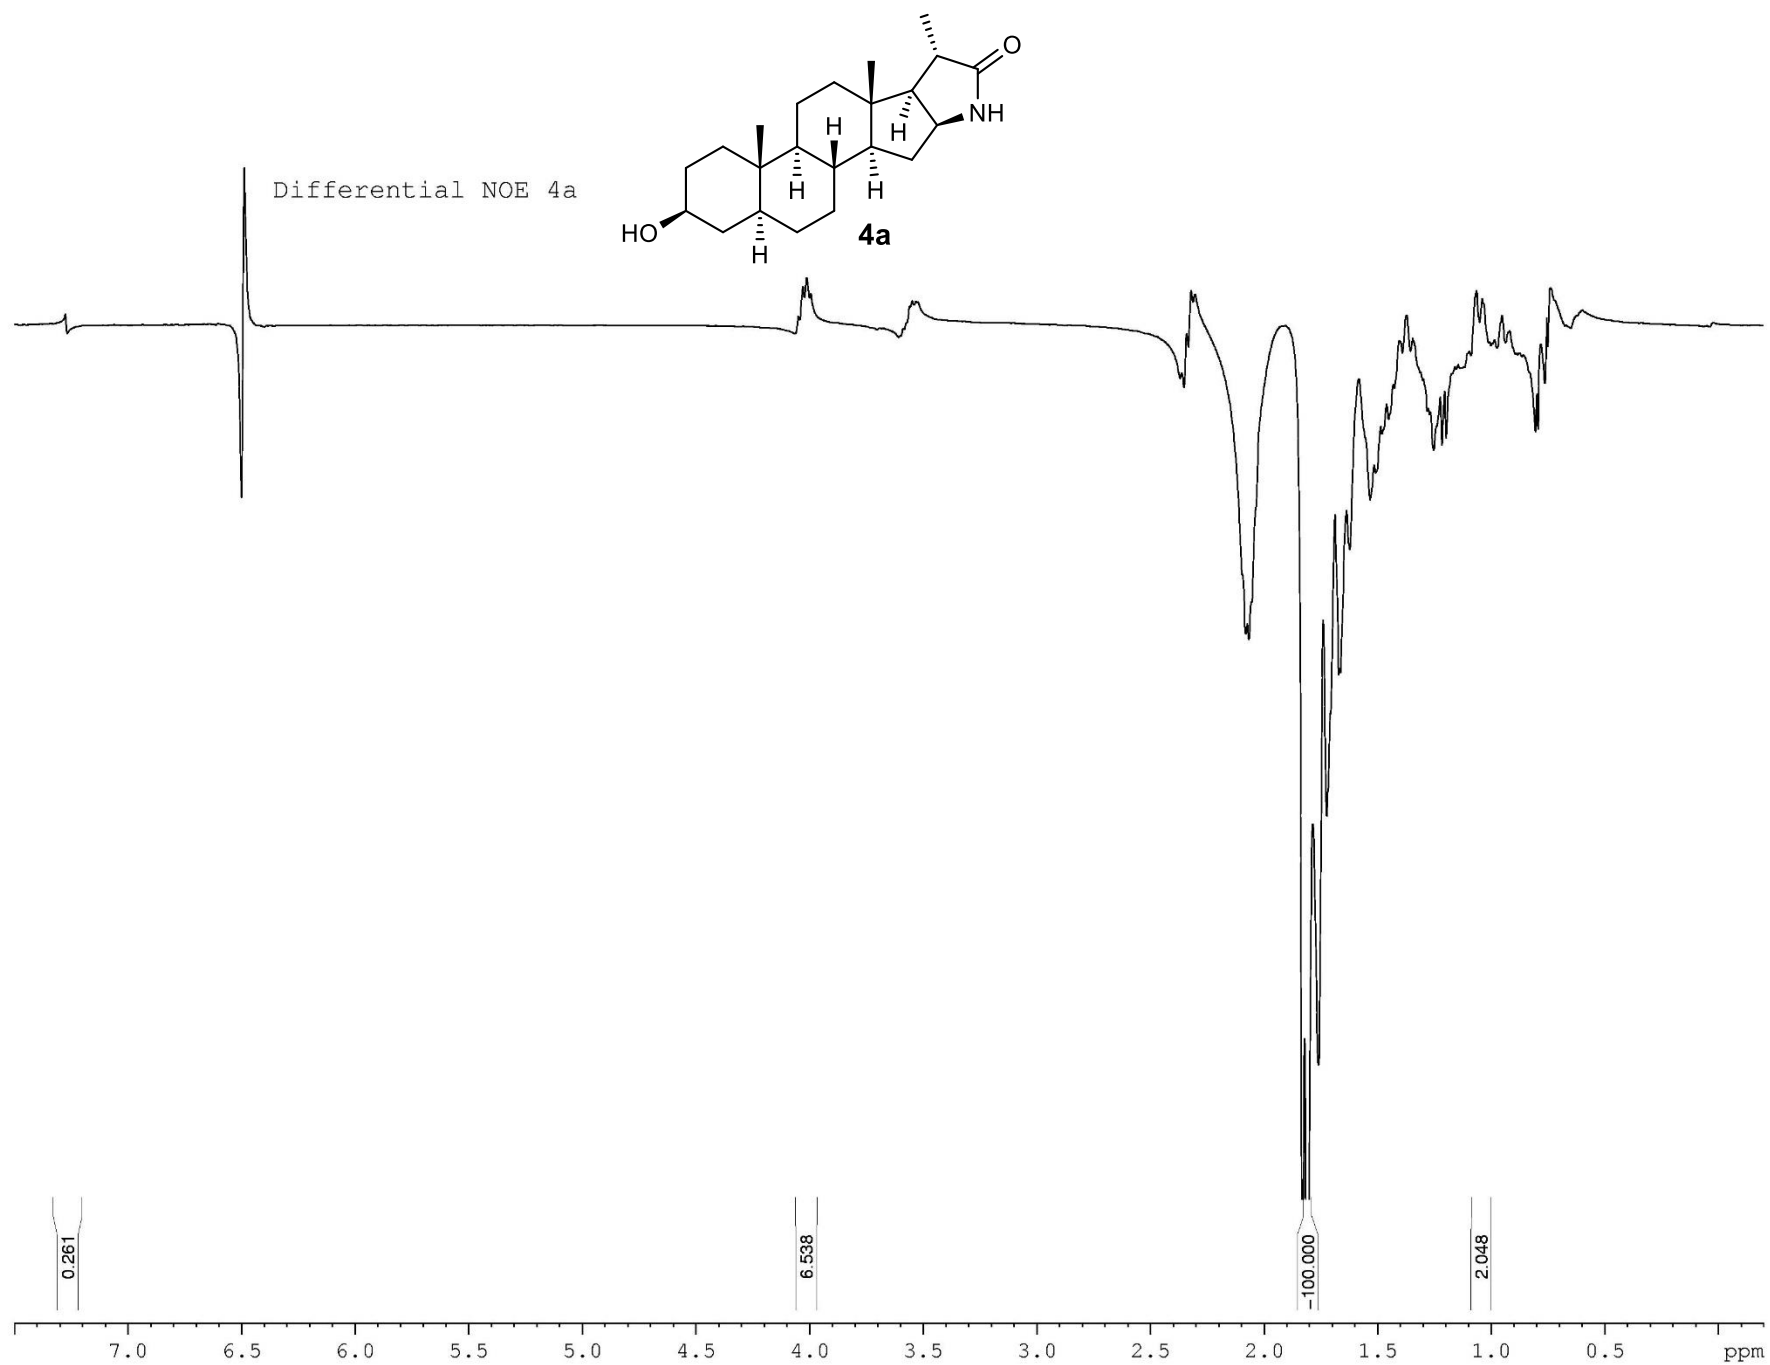

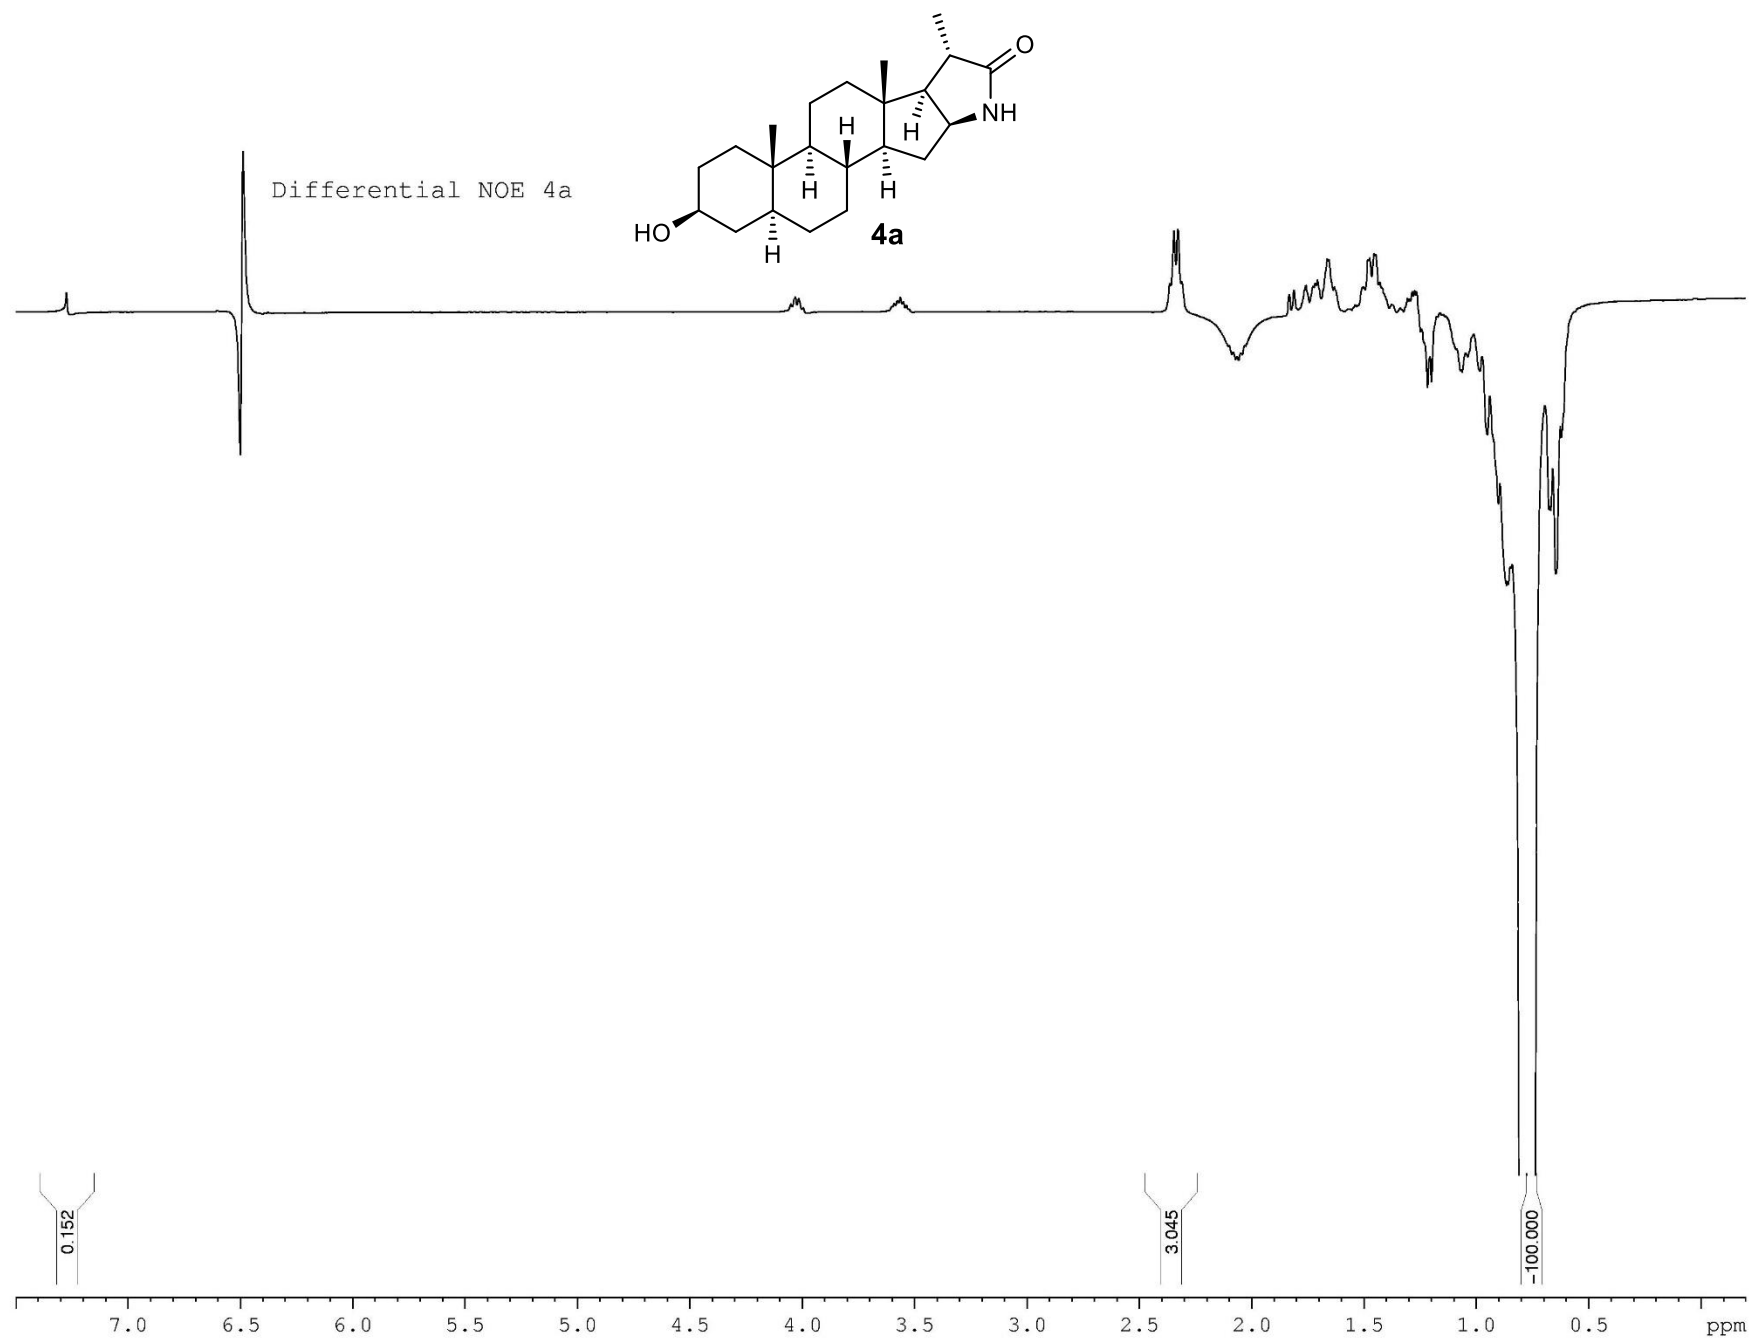

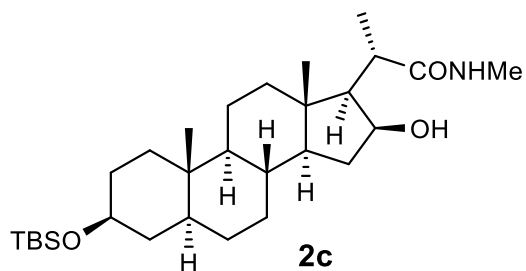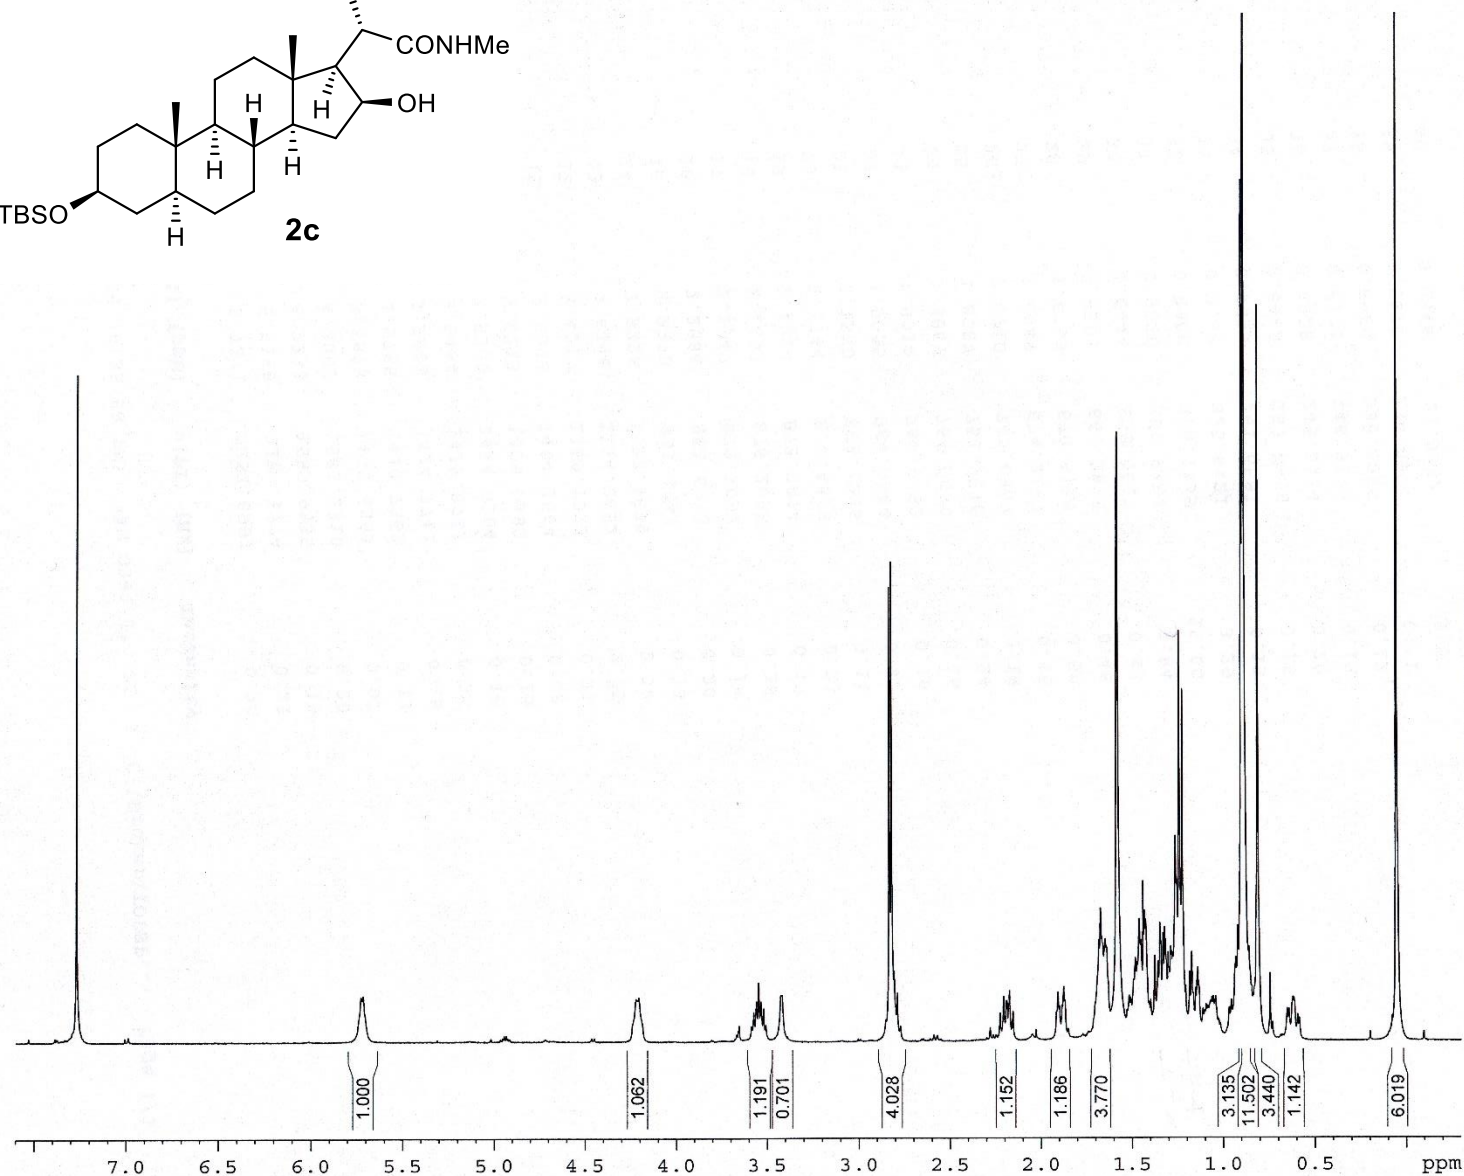

Current Data Parameters  
 NAME AW G341 I  
 EXPNO 11  
 PROCNO 1

F2 - Acquisition Parameters  
 Date 20200319  
 Time 15.38  
 INSTRUM spect  
 PROBHD 5 mm PABBO BB-  
 PULPROG zg30  
 TD 65536  
 SOLVENT CDCl3  
 NS 128  
 DS 0  
 SWH 8223.685 Hz  
 FIDRES 0.125483 Hz  
 AQ 3.9846387 sec  
 RG 32  
 DW 60.800 usec  
 DE 8.00 usec  
 TE 999.9 K  
 D1 1.00000000 sec  
 TDO 1

===== CHANNEL f1 =====  
 NUC1 1H  
 P1 64.00 usec  
 PL1 -3.00 dB  
 SFO1 400.1524711 MHz

F2 - Processing parameters  
 SI 32768  
 SF 400.1500000 MHz  
 WDW GM  
 SSB 0  
 LB -0.20 Hz  
 GB 0.2  
 PC 1.00

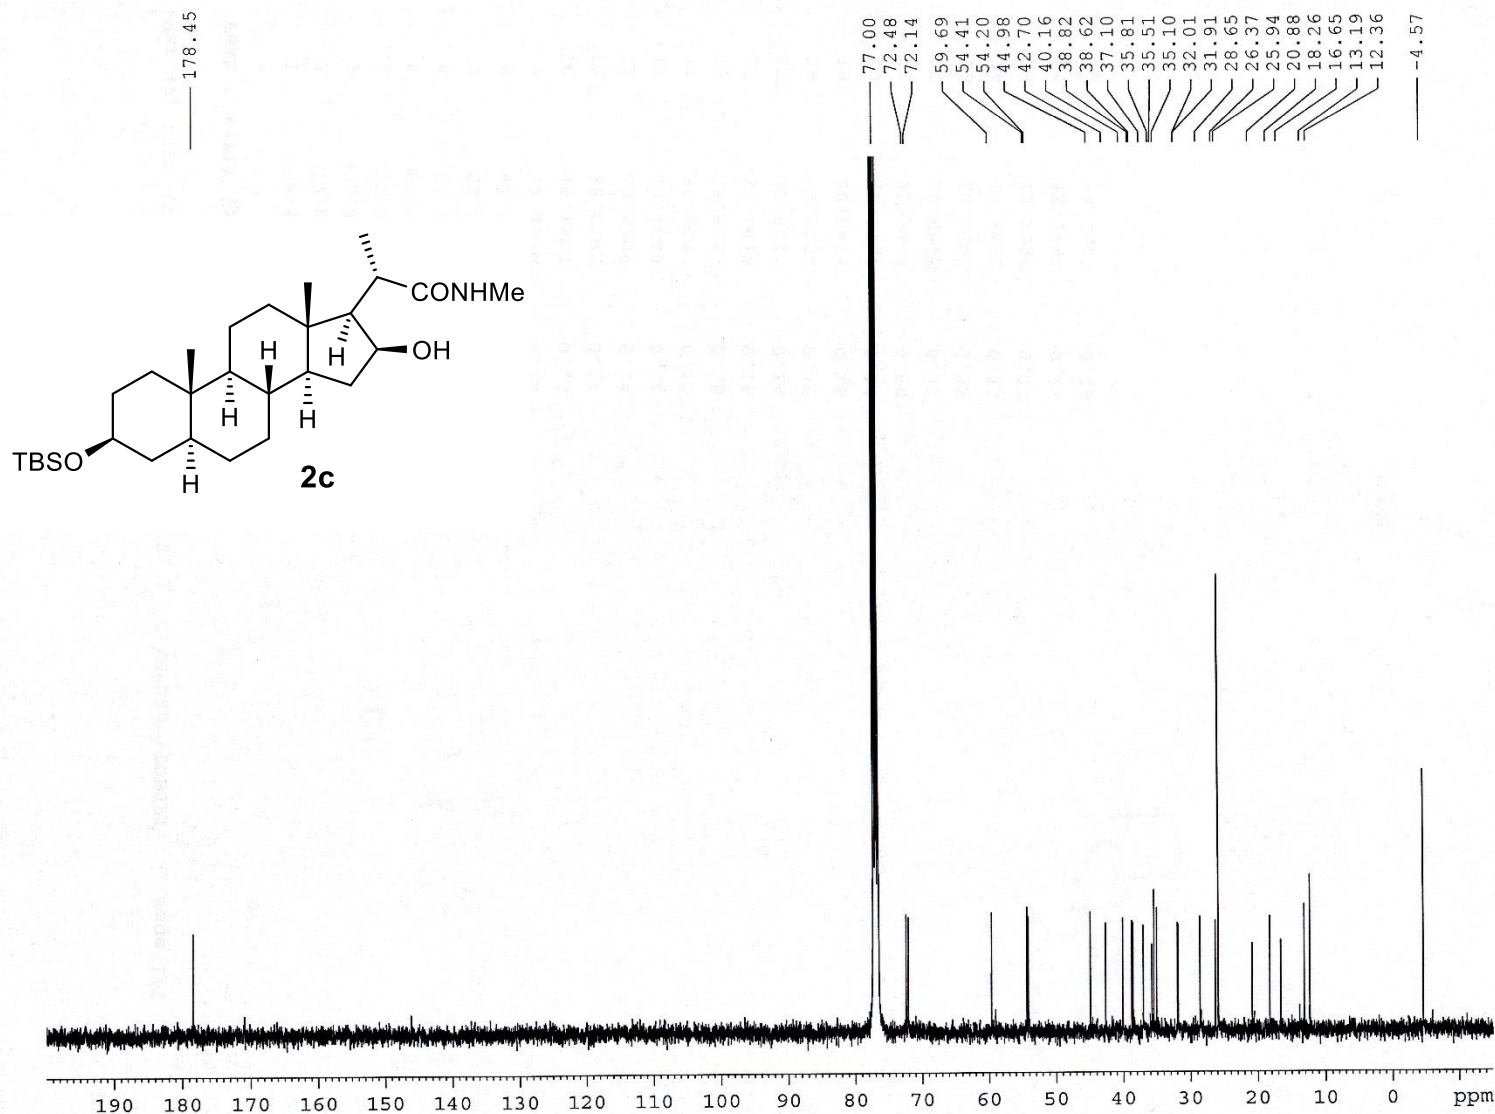

Current Data Parameters  
NAME AW G341 I  
EXPNO 2  
PROCNO 1

F2 - Acquisition Parameters  
Date\_ 20200320  
Time 8.40  
INSTRUM spect  
PROBHD 5 mm PABBO BB-  
PULPROG zgpg30  
TD 65536  
SOLVENT CDCl3  
NS 16384  
DS 4  
SWH 32051.281 Hz  
FIDRES 0.489064 Hz  
AQ 1.0224116 sec  
RG 128  
DW 15.600 usec  
DE 6.00 usec  
TE 999.9 K  
D1 2.00000000 sec  
d11 0.03000000 sec  
DELTA 1.89999998 sec  
TD0 1

===== CHANNEL f1 =====  
NUC1 13C  
P1 27.50 usec  
PL1 -1.00 dB  
SFO1 100.6298721 MHz

===== CHANNEL f2 =====  
CPDPRG2 waltz16  
NUC2 1H  
PCPD2 100.00 usec  
PL2 -3.00 dB  
PL12 13.65 dB  
PL13 18.00 dB  
SFO2 400.1516006 MHz

F2 - Processing parameters  
SI 32768  
SF 100.6177982 MHz  
WDW EM  
SSB 0  
LB 1.00 Hz  
GB 0  
PC 0.20

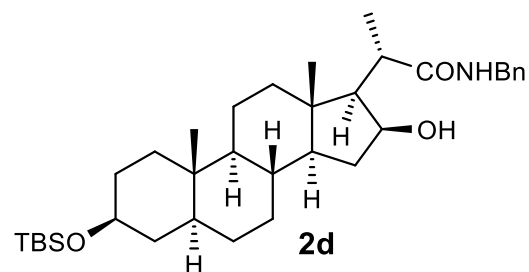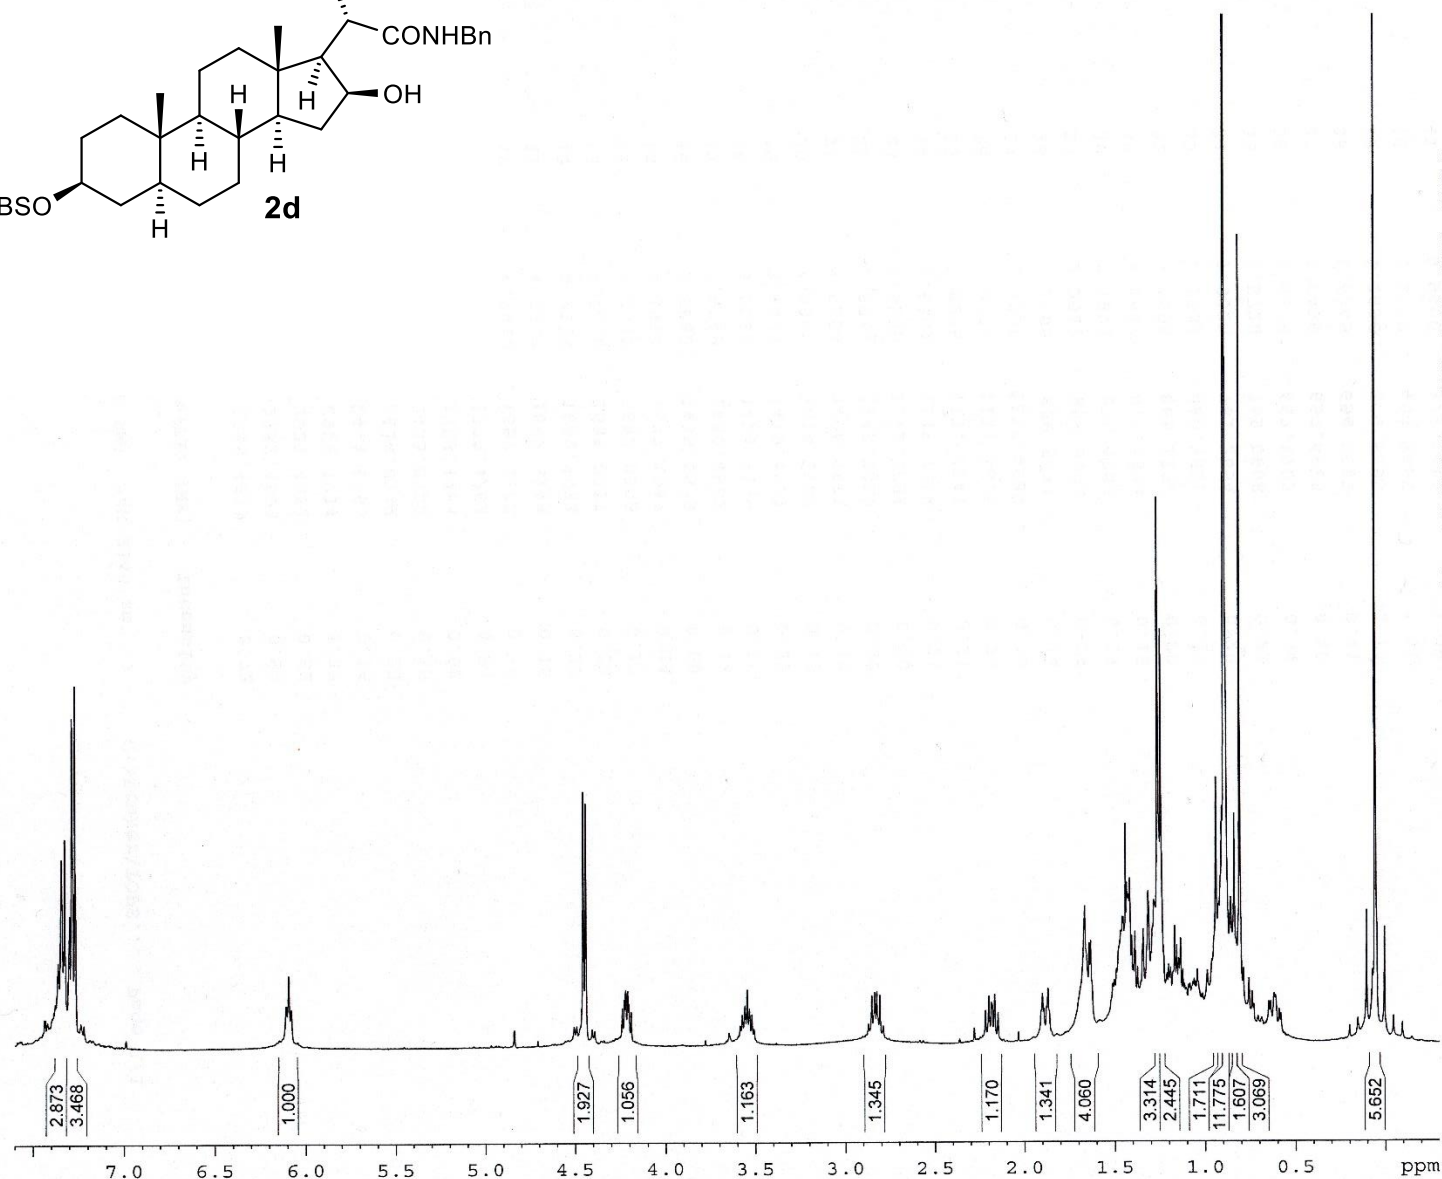

Current Data Parameters  
 NAME AW G340 sm  
 EXPNO 1  
 PROCNO 1

F2 - Acquisition Parameters  
 Date 20200225  
 Time 15.52  
 INSTRUM spect  
 PROBHD 5 mm FABBO BB-  
 PULPROG zg30  
 TD 65536  
 SOLVENT CDCl<sub>3</sub>  
 NS 128  
 DS 0  
 SWH 8223.685 Hz  
 FIDRES 0.125483 Hz  
 AQ 3.9846387 sec  
 RG 203  
 DW 60.800 usec  
 DE 8.00 usec  
 TE 999.9 K  
 D1 1.00000000 sec  
 TD0 1

===== CHANNEL f1 =====  
 NUC1 1H  
 P1 20.00 usec  
 PL1 -3.00 dB  
 SFO1 400.1524711 MHz

F2 - Processing parameters  
 SI 32768  
 SF 400.1500000 MHz  
 WDW GM  
 SSB 0  
 LB -0.20 Hz  
 GB 0.2  
 PC 1.00

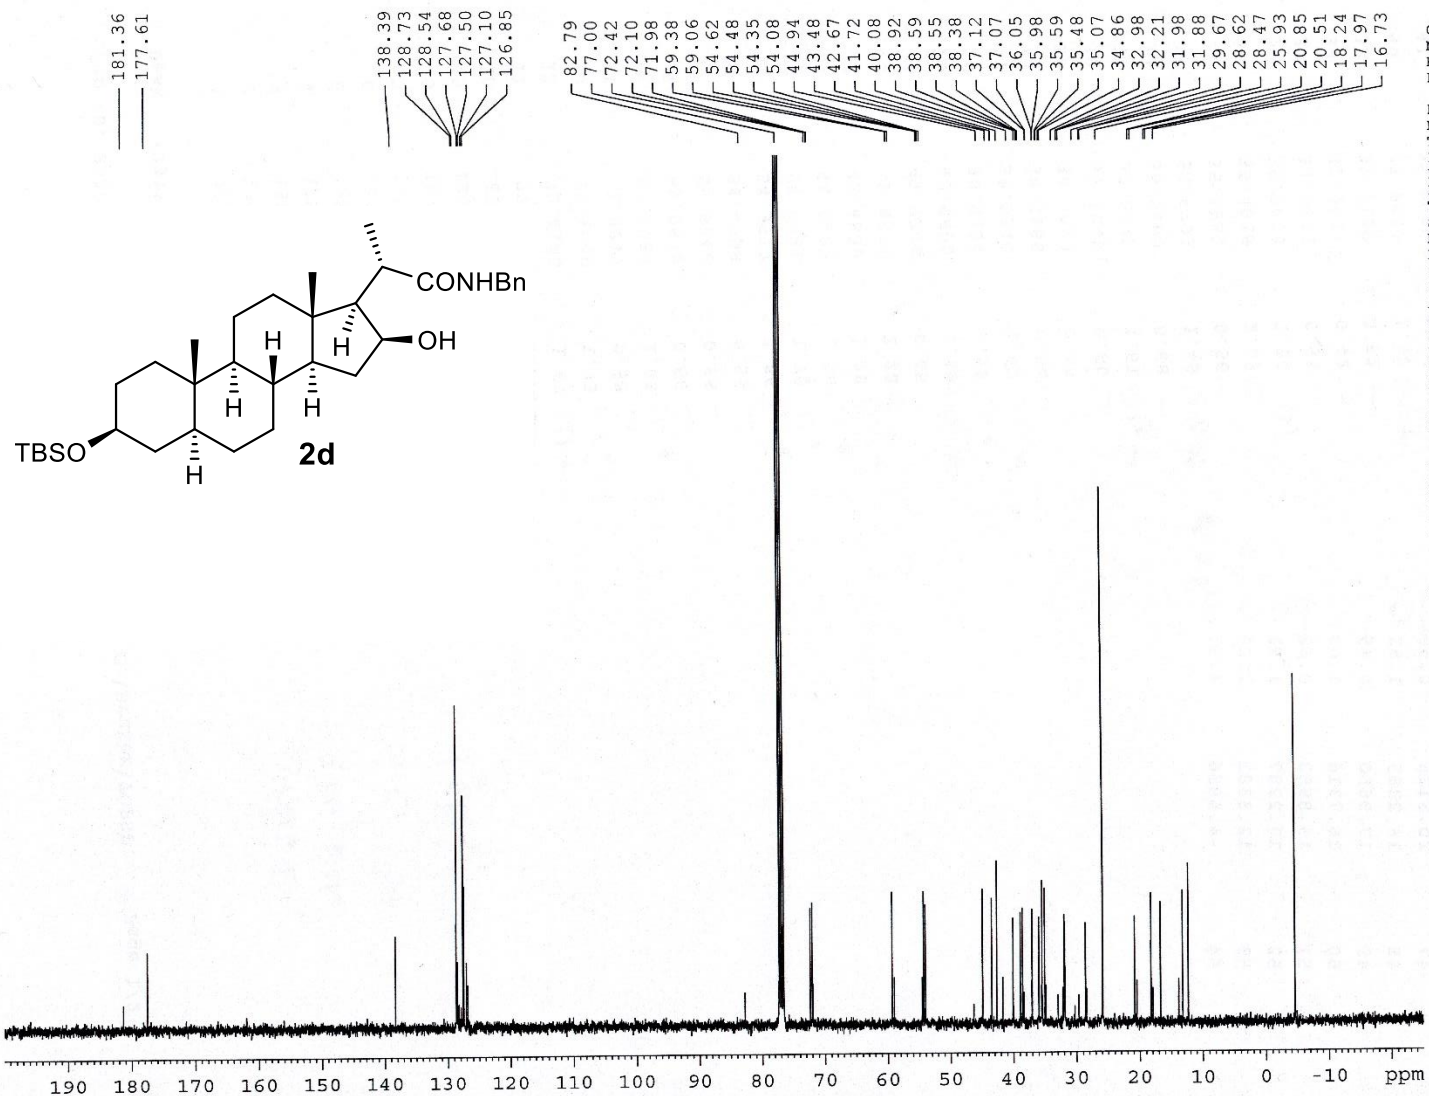

Current Data Parameters  
 NAME AW G340 sm  
 EXPNO 2  
 PROCNO 1

F2 - Acquisition Parameters  
 Date\_ 20200228  
 Time 13.00  
 INSTRUM spect  
 PROBHD 5 mm PABBO BB-  
 PULPROG zgpg30  
 TD 65536  
 SOLVENT CDCl3  
 NS 1024  
 DS 4  
 SWH 32051.281 Hz  
 FIDRES 0.489064 Hz  
 AQ 1.0224116 sec  
 RG 2050  
 DW 15.600 usec  
 DE 6.00 usec  
 TE 999.9 K  
 D1 2.00000000 sec  
 d11 0.03000000 sec  
 DELTA 1.89999998 sec  
 TD0 1

===== CHANNEL f1 =====  
 NUC1 13C  
 P1 27.50 usec  
 PL1 -1.00 dB  
 SFO1 100.6298721 MHz

===== CHANNEL f2 =====  
 CPDPRG2 waltz16  
 NUC2 1H  
 PCPD2 100.00 usec  
 PL2 -3.00 dB  
 PL12 13.65 dB  
 PL13 18.00 dB  
 SFO2 400.1516006 MHz

F2 - Processing parameters  
 SI 32768  
 SF 100.6178010 MHz  
 WDW EM  
 SSB 0  
 LB 1.00 Hz  
 GB 0  
 FC 1.40

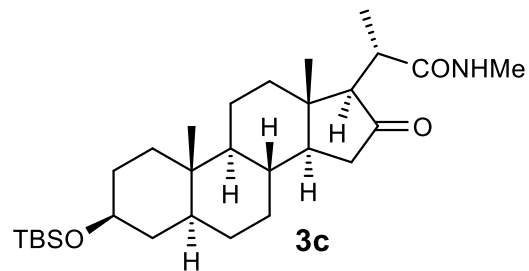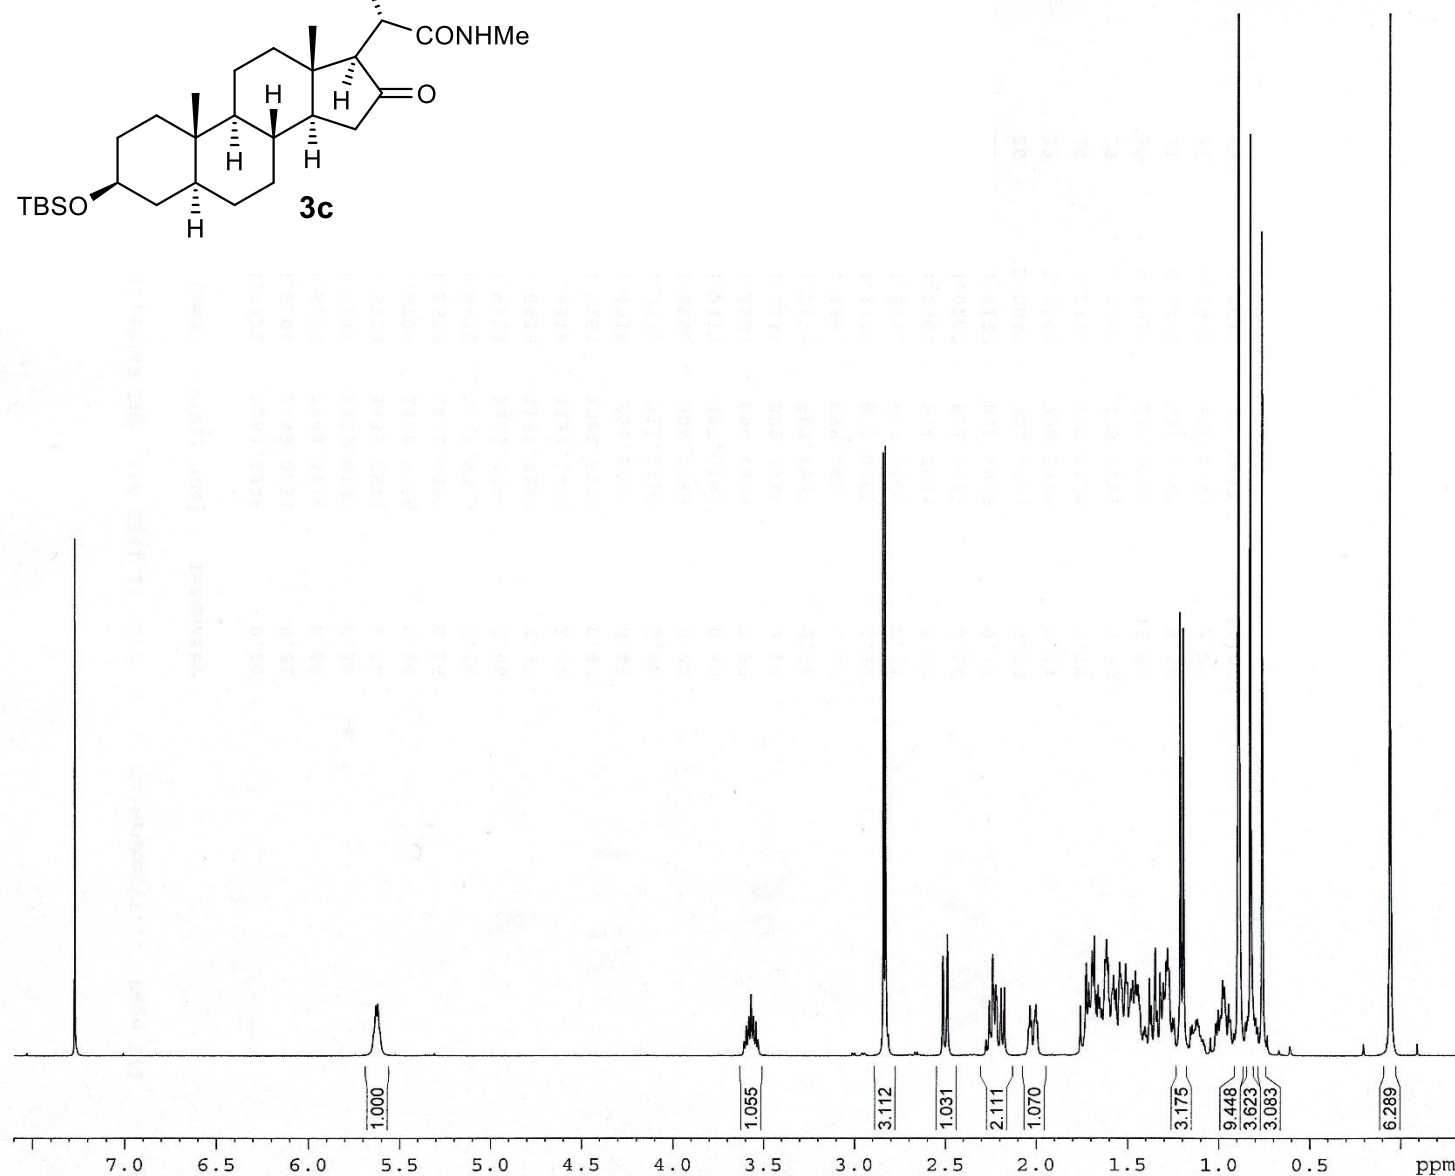

Current Data Parameters  
 NAME AW G341 II (2)  
 EXPNO 1  
 PROCNO 1

F2 - Acquisition Parameters  
 Date\_ 20200303  
 Time 12.52  
 INSTRUM spect  
 PROBHD 5 mm PABBO BB-  
 PULPROG zg30  
 TD 65536  
 SOLVENT CDCl<sub>3</sub>  
 NS 128  
 DS 0  
 SWH 8223.685 Hz  
 FIDRES 0.125483 Hz  
 AQ 3.9846387 sec  
 RG 322  
 DW 60.800 usec  
 DE 8.00 usec  
 TE 299.2 K  
 D1 1.00000000 sec  
 TDO 1

===== CHANNEL f1 =====  
 NUC1 1H  
 P1 11.15 usec  
 PL1 -3.00 dB  
 SFO1 400.1524711 MHz

F2 - Processing parameters  
 SI 32768  
 SF 400.1500000 MHz  
 WDW GM  
 SSB 0  
 LB -0.20 Hz  
 GB 0.2  
 PC 1.00

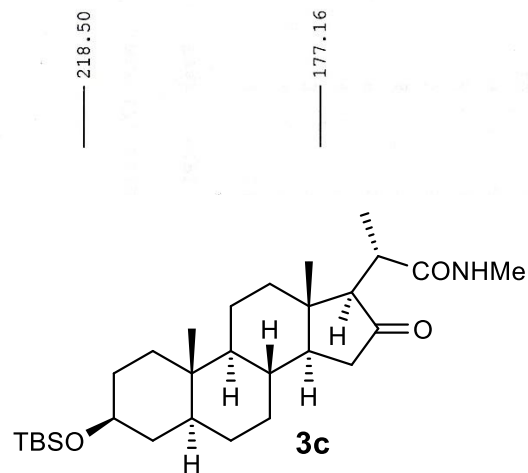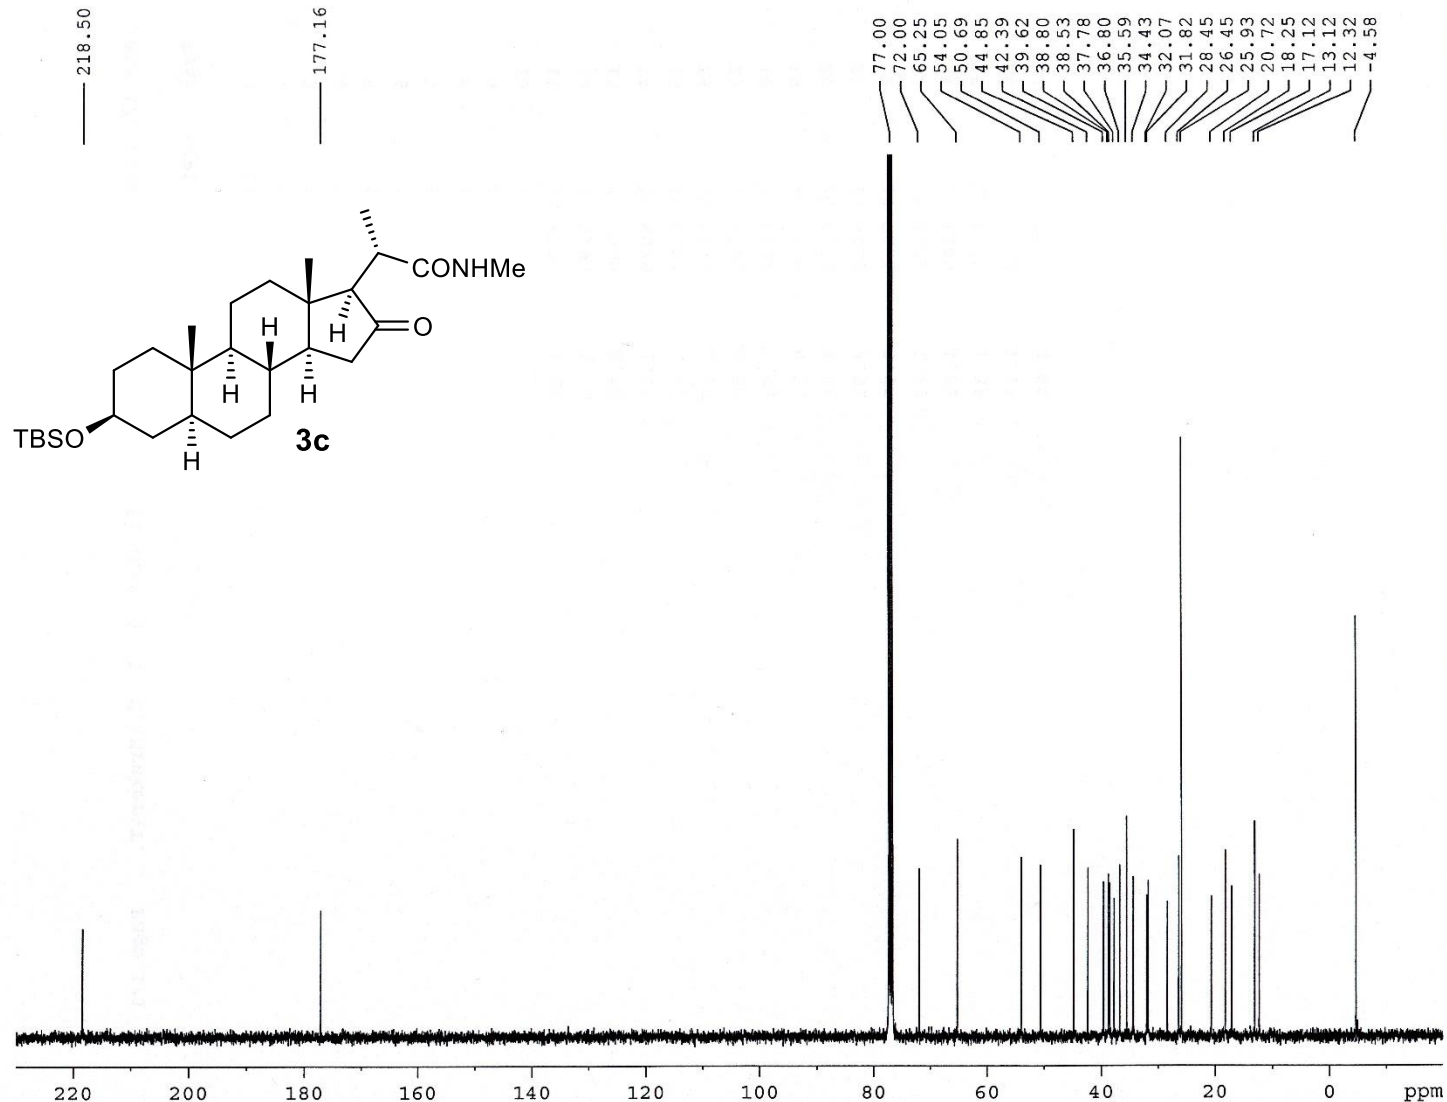

Current Data Parameters  
 NAME AW G341 II (2)  
 EXPNO 2  
 PROCNO 1

F2 - Acquisition Parameters  
 Date\_ 20200311  
 Time 17.09  
 INSTRUM spect  
 PROBHD 5 mm PABBO BB-  
 PULPROG zgpg30  
 TD 65536  
 SOLVENT CDCl3  
 NS 2816  
 DS 4  
 SWH 32051.281 Hz  
 FIDRES 0.489064 Hz  
 AQ 1.0224116 sec  
 RG 2050  
 DW 15.600 usec  
 DE 6.00 usec  
 TE 296.8 K  
 D1 2.00000000 sec  
 d11 0.03000000 sec  
 DELTA 1.89999998 sec  
 TD0 1

===== CHANNEL f1 =====  
 NUC1 13C  
 P1 27.50 usec  
 PL1 -1.00 dB  
 SFO1 100.6298721 MHz

===== CHANNEL f2 =====  
 CPDPRG2 waltz16  
 NUC2 1H  
 PCPD2 100.00 usec  
 PL2 -3.00 dB  
 PL12 13.65 dB  
 PL13 18.00 dB  
 SFO2 400.1516006 MHz

F2 - Processing parameters  
 SI 32768  
 SF 100.6177995 MHz  
 WDW EM  
 SSB 0  
 LB 1.00 Hz  
 GB 0  
 PC 0.20

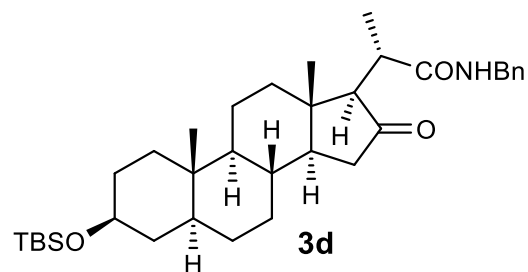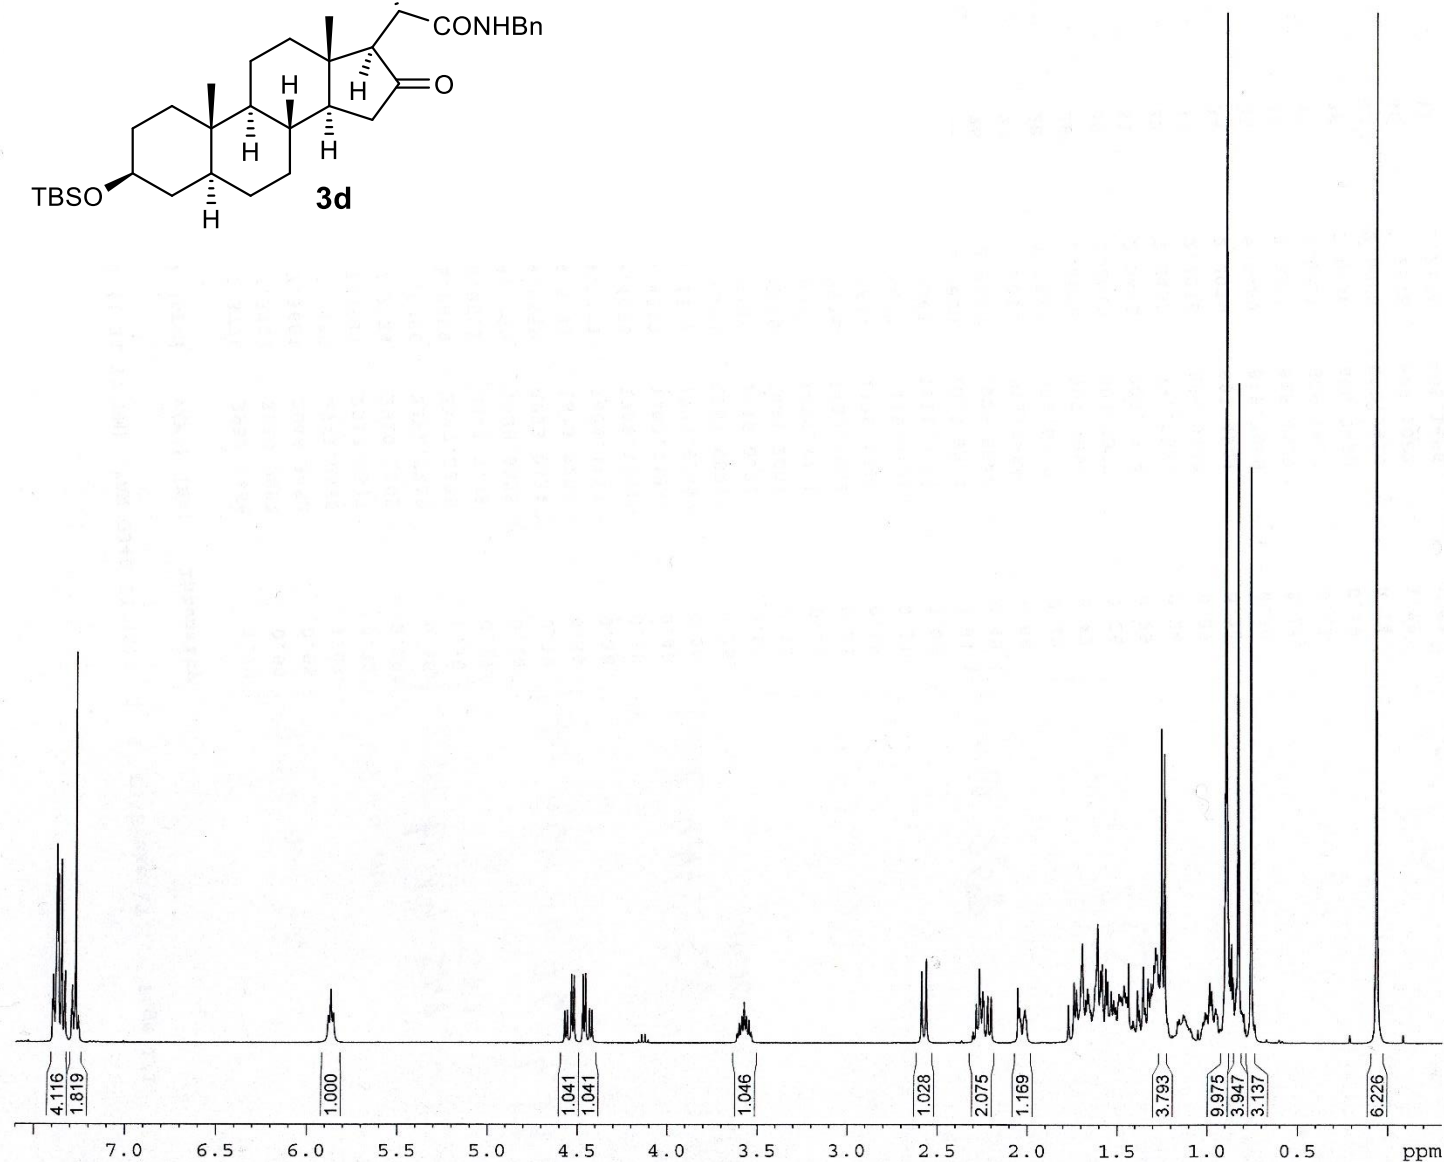

Current Data Parameters  
NAME AW G340 II (2)  
EXPNO 1  
PROCNO 1

F2 - Acquisition Parameters  
Date\_ 20200227  
Time\_ 13.11  
INSTRUM spect  
PROBHD 5 mm PABBO BB-  
PULPROG zg30  
TD 65536  
SOLVENT CDCl3  
NS 128  
DS 0  
SWH 8223.685 Hz  
FIDRES 0.125483 Hz  
AQ 3.9846387 sec  
RG 322  
DW 60.800 usec  
DE 8.00 usec  
TE 999.9 K  
D1 1.00000000 sec  
TDO 1

----- CHANNEL f1 -----  
NUC1 1H  
P1 9.80 usec  
PL1 -3.00 dB  
SFO1 400.1524711 MHz

F2 - Processing parameters  
SI 32768  
SF 400.1500000 MHz  
WDW GM  
SSB 0  
LB -0.20 Hz  
GB 0.2  
PC 1.00

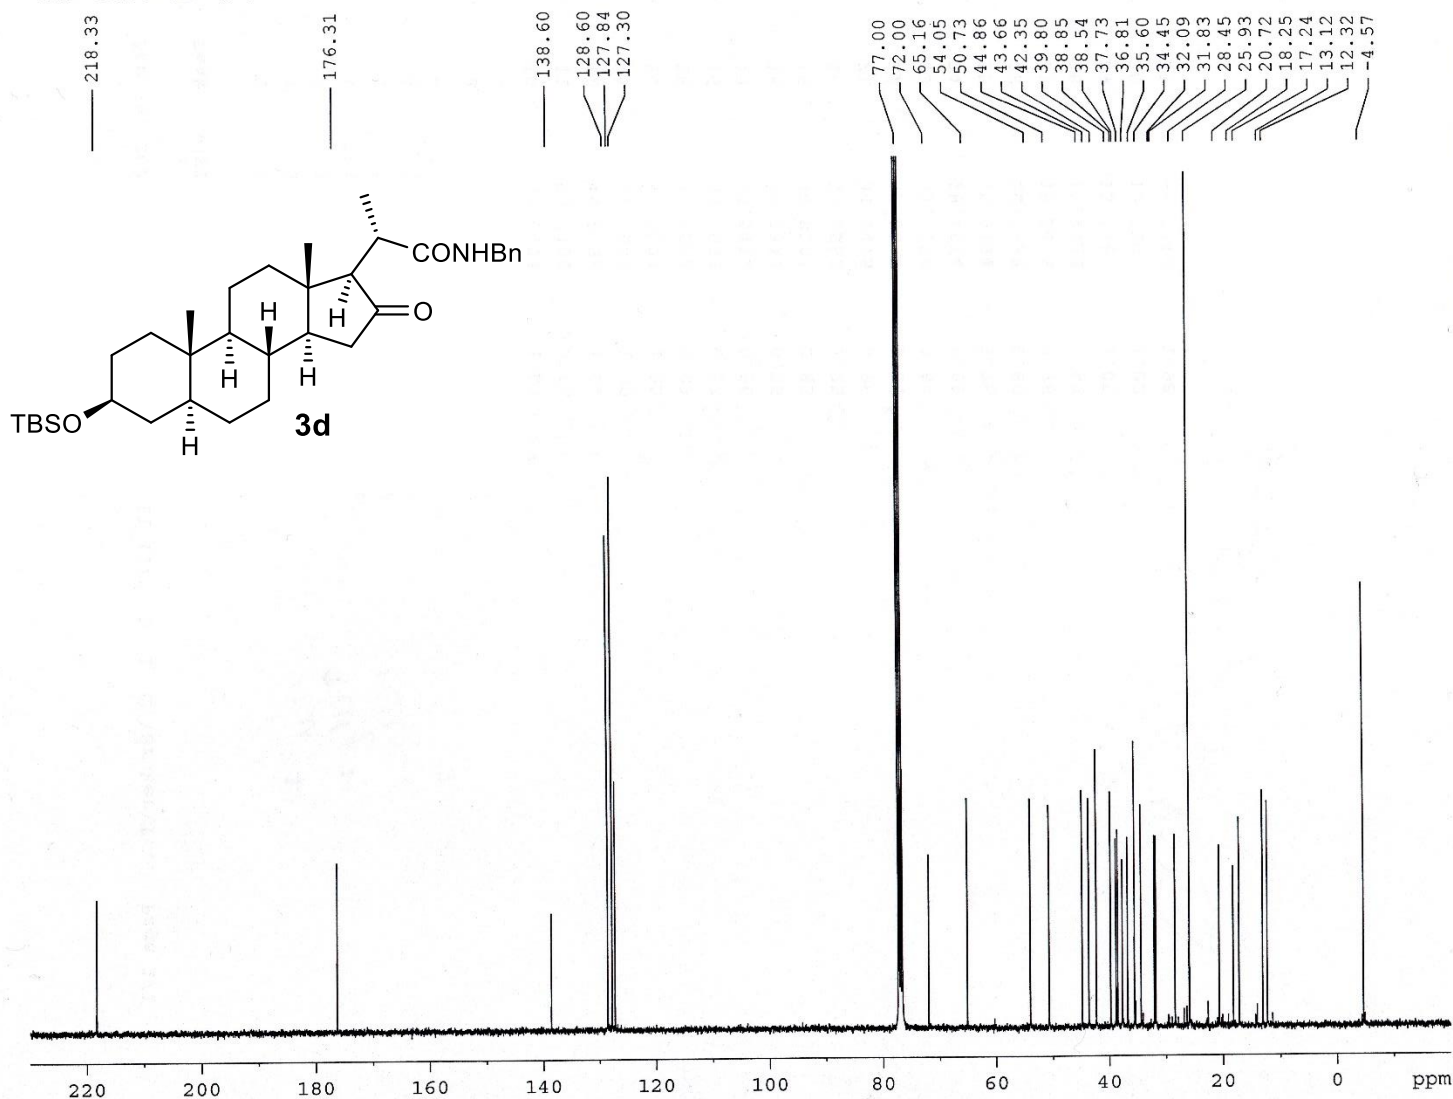

Current Data Parameters  
 NAME AW G340 II (2)  
 EXPNO 2  
 PROCNO 1

F2 - Acquisition Parameters  
 Date\_ 20200229  
 Time 5.21  
 INSTRUM spect  
 PROBHD 5 mm PABBO BB-  
 PULPROG zgpg30  
 TD 65536  
 SOLVENT CDCl3  
 NS 14400  
 DS 4  
 SWH 32051.281 Hz  
 FIDRES 0.489064 Hz  
 AQ 1.0224116 sec  
 RG 90.5  
 DW 15.600 usec  
 DE 6.00 usec  
 TE 999.9 K  
 D1 2.00000000 sec  
 d11 0.03000000 sec  
 DELTA 1.89999998 sec  
 TDO 1

===== CHANNEL f1 =====  
 NUC1 13C  
 P1 27.50 usec  
 PL1 -1.00 dB  
 SFO1 100.6298721 MHz

===== CHANNEL f2 =====  
 CPDPRG2 waltz16  
 NUC2 1H  
 PCPD2 100.00 usec  
 PL2 -3.00 dB  
 PL12 13.65 dB  
 PL13 18.00 dB  
 SFO2 400.1516006 MHz

F2 - Processing parameters  
 SI 32768  
 SF 100.6177994 MHz  
 WDW EM  
 SSB 0  
 LB 1.00 Hz  
 GB 0  
 PC 0.20

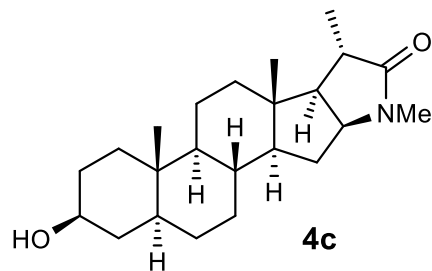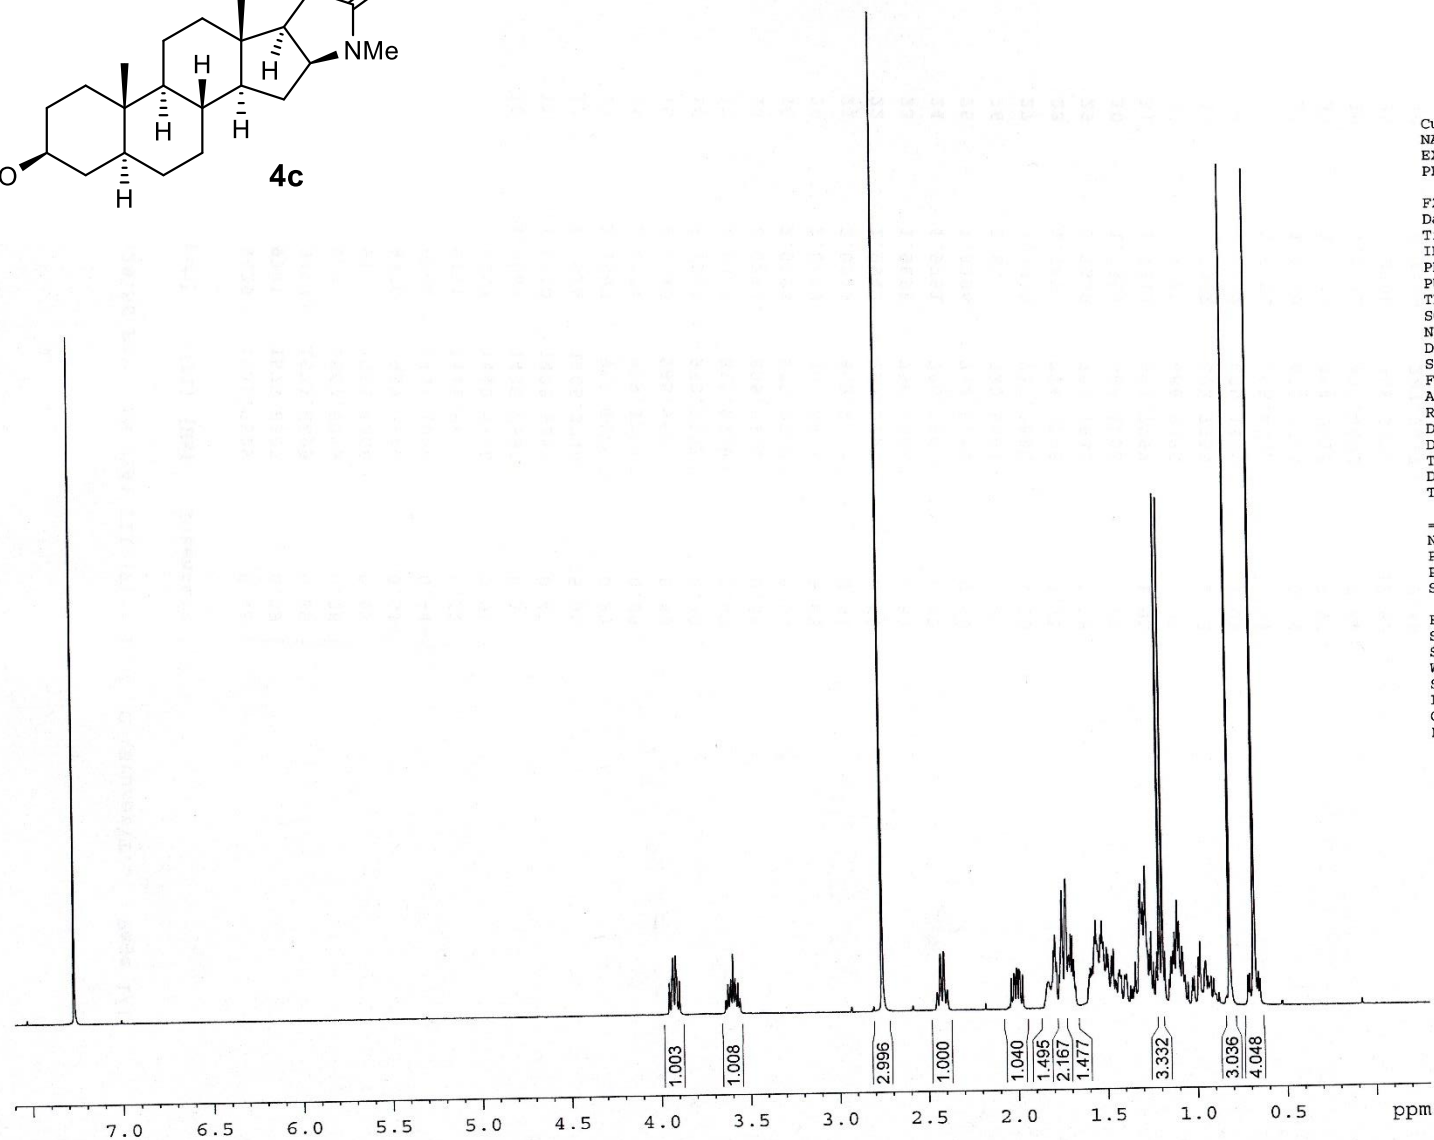

Current Data Parameters  
 NAME AW G341 III (2)  
 EXPNO 1  
 PROCNO 1

F2 - Acquisition Parameters  
 Date\_ 20200304  
 Time 17.19  
 INSTRUM spect  
 PROBHD 5 mm PABBO BB-  
 PULPROG zg30  
 TD 65536  
 SOLVENT CDCl3  
 NS 128  
 DS 0  
 SWH 8223.695 Hz  
 FIDRES 0.125483 Hz  
 AQ 3.9846387 sec  
 RG 322  
 DW 60.800 usec  
 DE 8.00 usec  
 TE 296.9 K  
 D1 1.00000000 sec  
 TDO 1

===== CHANNEL f1 =====  
 NUC1 1H  
 P1 11.15 usec  
 PL1 -3.00 dB  
 SFO1 400.1524711 MHz

F2 - Processing parameters  
 SI 32768  
 SF 400.1500000 MHz  
 WDW GM  
 SSB 0  
 LB -0.20 Hz  
 GB 0.2  
 PC 1.00

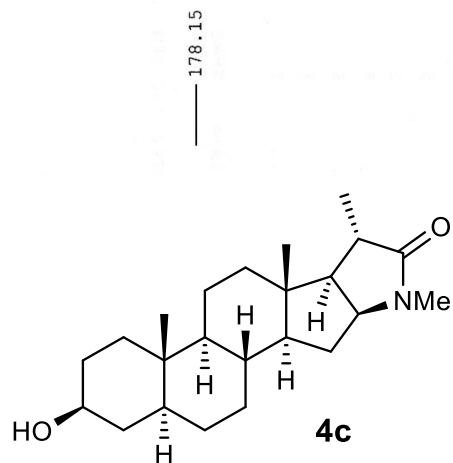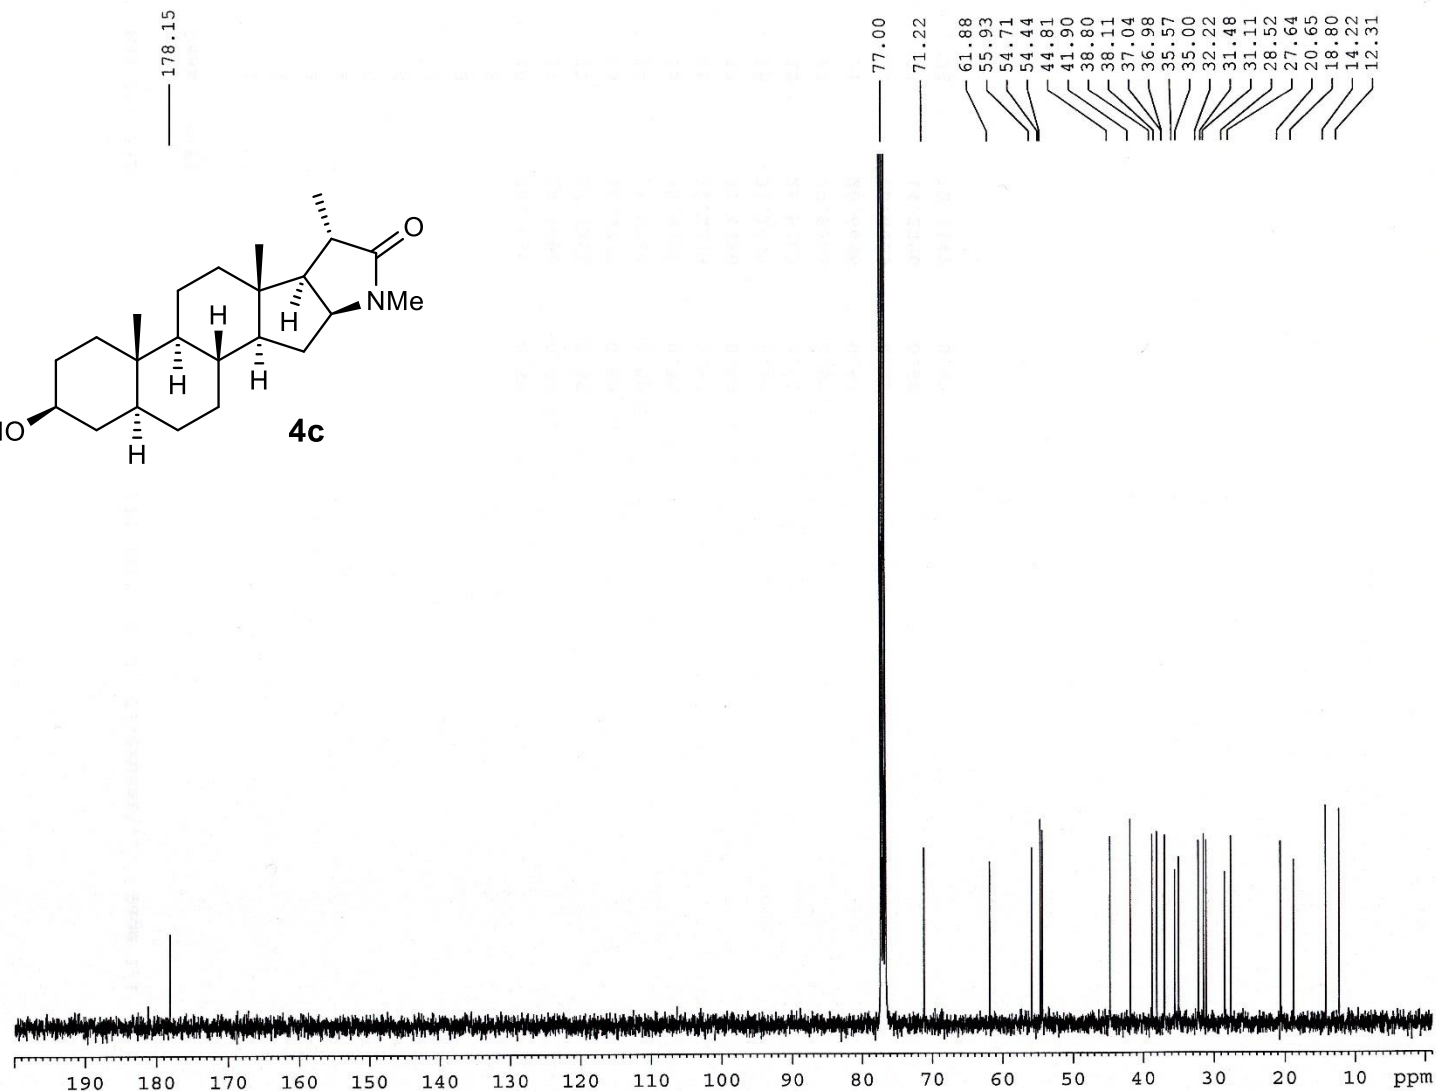

Current Data Parameters  
NAME AW G341 I11 (2)  
EXPNO 2  
PROCNO 1

F2 - Acquisition Parameters  
Date\_ 20200310  
Time 14.58  
INSTRUM spect  
PROBHD 5 mm PABBO BB-  
PULPROG zgpg30  
TD 65536  
SOLVENT CDCl3  
NS 1920  
DS 4  
SWH 32051.281 Hz  
FIDRES 0.489064 Hz  
AQ 1.0224116 sec  
RG 2050  
DW 15.600 usec  
DE 6.00 usec  
TE 297.0 K  
D1 2.00000000 sec  
d11 0.03000000 sec  
DELTA 1.89999998 sec  
TD0 1

===== CHANNEL f1 =====  
NUC1 13C  
P1 27.50 usec  
PL1 -1.00 dB  
SFO1 100.6298721 MHz

===== CHANNEL f2 =====  
CPDPRG2 waltz16  
NUC2 1H  
PCPD2 100.00 usec  
PL2 -3.00 dB  
PL12 13.65 dB  
PL13 18.00 dB  
SFO2 400.1516006 MHz

F2 - Processing parameters  
SI 32768  
SF 100.6177993 MHz  
WDW EM  
SSB 0  
LB 1.00 Hz  
GB 0  
PC 0.20

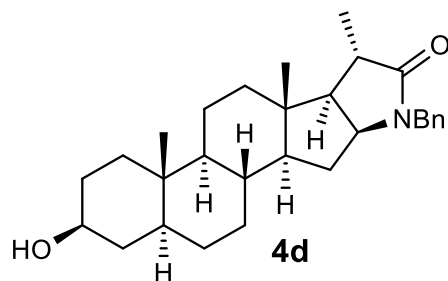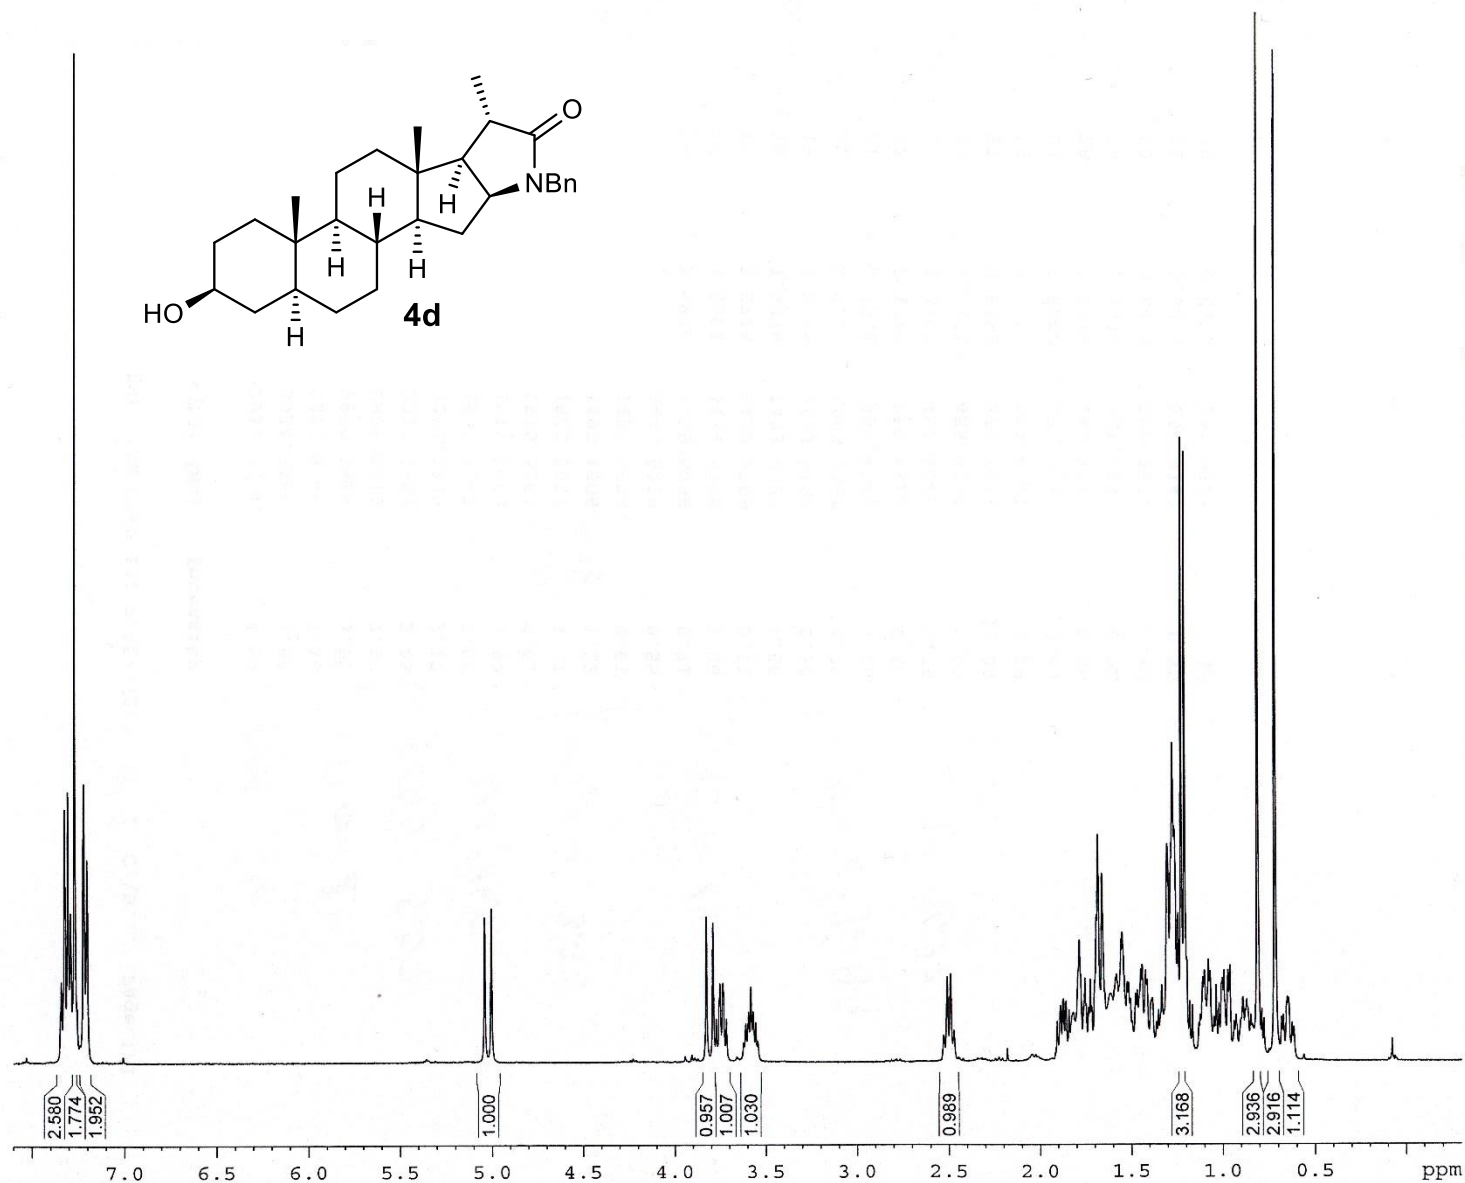

Current Data Parameters  
 NAME AW G340 III PtTf3-(2)  
 EXPNO 11  
 PROCNO 1

F2 - Acquisition Parameters  
 Date\_ 20200304  
 Time\_ 16.17  
 INSTRUM spect  
 PROBHD 5 mm PABBO BB-  
 PULPROG zg30  
 TD 65536  
 SOLVENT CDCl3  
 NS 128  
 DS 0  
 SWH 8223.685 Hz  
 FIDRES 0.125483 Hz  
 AQ 3.9846387 sec  
 RG 322  
 DW 60.800 usec  
 DE 8.00 usec  
 TE 296.9 K  
 D1 1.00000000 sec  
 TDO 1

===== CHANNEL f1 =====  
 NUC1 1H  
 P1 11.15 usec  
 PL1 -3.00 dB  
 SFO1 400.1524711 MHz

F2 - Processing parameters  
 SI 32768  
 SF 400.1500000 MHz  
 WDW GM  
 SSB 0  
 LB -0.20 Hz  
 GB 0.2  
 PC 1.00

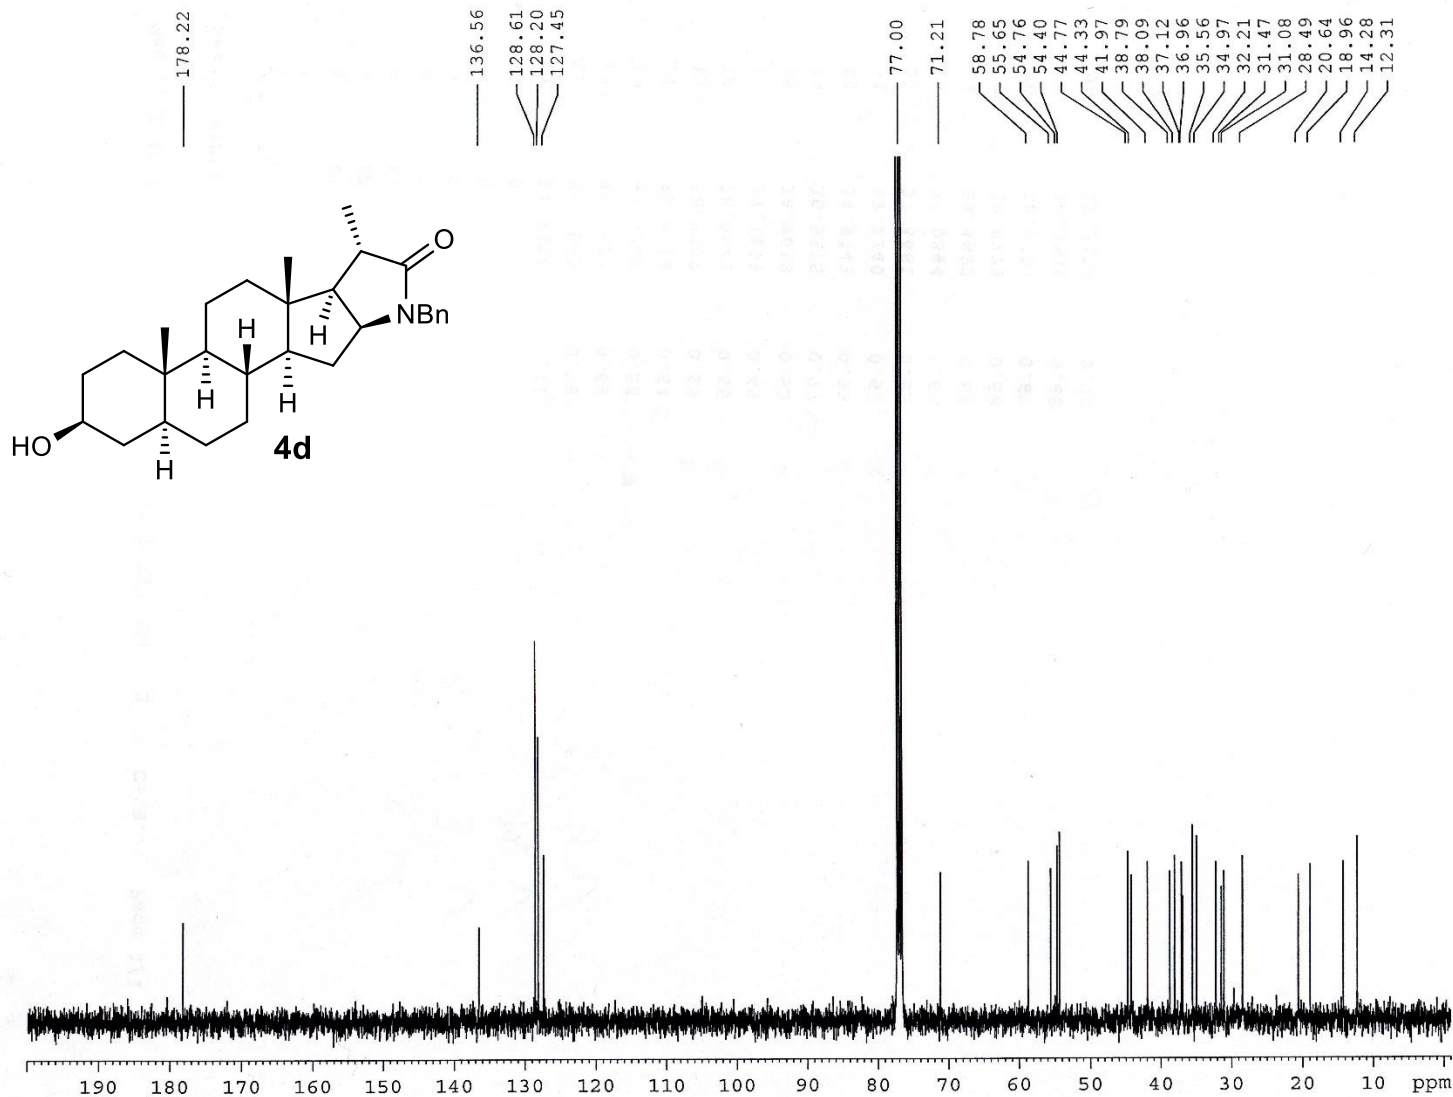

Current Data Parameters  
 NAME AW G340 III PiTf3-(2)  
 EXPNO 2  
 PROCNO 1

F2 - Acquisition Parameters  
 Date\_ 20200305  
 Time\_ 10.35  
 INSTRUM spect  
 PROBHD 5 mm PABBO BB-  
 PULPROG zgpg30  
 TD 65536  
 SOLVENT CDCl3  
 NS 1664  
 DS 4  
 SWH 32051.281 Hz  
 FIDRES 0.489064 Hz  
 AQ 1.0224116 sec  
 RG 2050  
 DW 15.600 usec  
 DE 6.00 usec  
 TE 296.9 K  
 D1 2.00000000 sec  
 d11 0.03000000 sec  
 DELTA 1.89999998 sec  
 TDO 1

===== CHANNEL f1 =====  
 NUC1 13C  
 P1 27.50 usec  
 PL1 -1.00 dB  
 SFO1 100.6298721 MHz

===== CHANNEL f2 =====  
 CPDPRG2 waltz16  
 NUC2 1H  
 PCPD2 100.00 usec  
 PL2 -3.00 dB  
 PL12 13.65 dB  
 PL13 18.00 dB  
 SFO2 400.1516006 MHz

F2 - Processing parameters  
 SI 32768  
 SF 100.6177994 MHz  
 WDW EM  
 SSB 0  
 LB 1.00 Hz  
 GB 0  
 PC 0.20

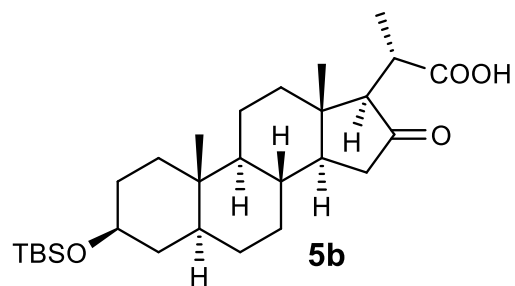

— 9.64

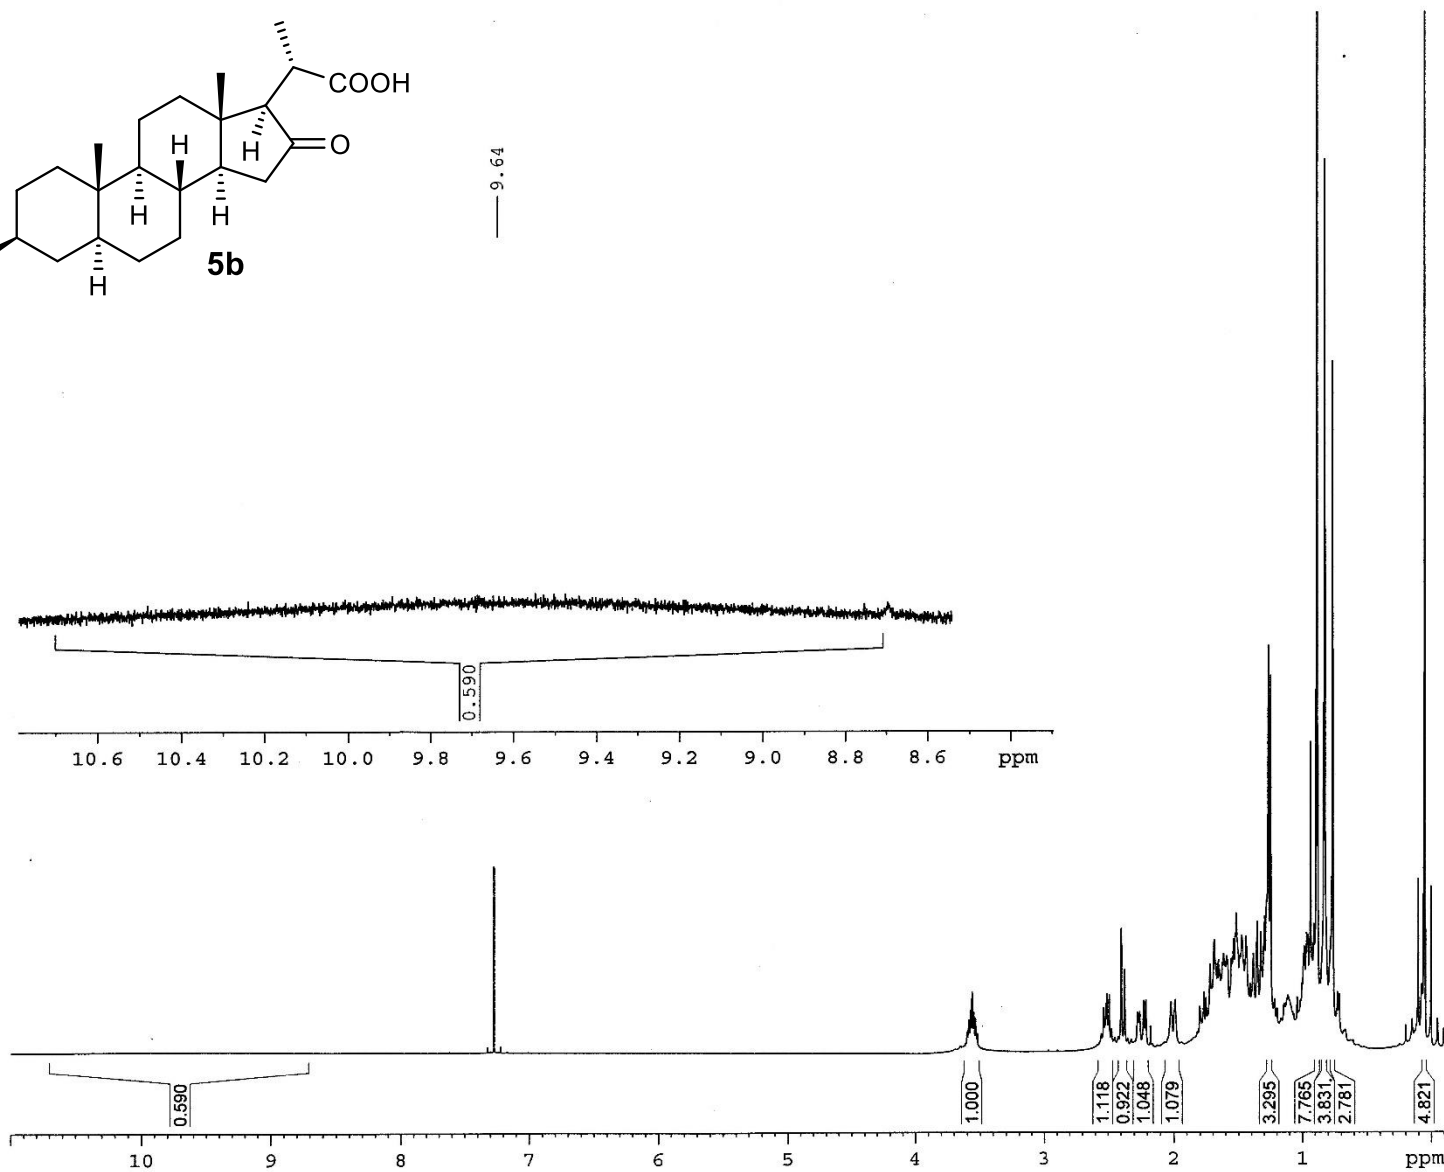

Current Data Parameters  
NAME DP 30TBS-oksokwas  
EXPNO 1  
PROCNO 1

F2 - Acquisition Parameters  
Date\_ 20200111  
Time 16.36  
INSTRUM spect  
PROBHD 5 mm PABBO BB-  
PULPROG zg30  
TD 65536  
SOLVENT CDCl3  
NS 128  
DS 0  
SWH 8223.685 Hz  
FIDRES 0.125483 Hz  
AQ 3.9846387 sec  
RG 228  
DW 60.800 usec  
DE 8.00 usec  
TE 999.9 K  
D1 1.0000000 sec  
TD0 1

===== CHANNEL f1 =====  
NUC1 1H  
P1 11.15 usec  
PL1 -3.00 dB  
SFO1 400.1524711 MHz

F2 - Processing parameters  
SI 32768  
SF 400.1500000 MHz  
WDW GM  
SSB 0  
LB -0.20 Hz  
GB 0.2  
PC 1.00

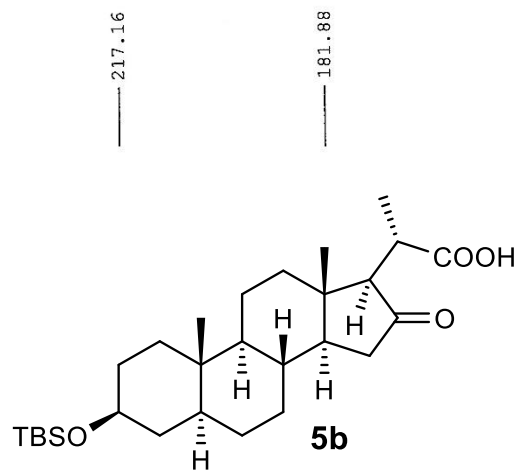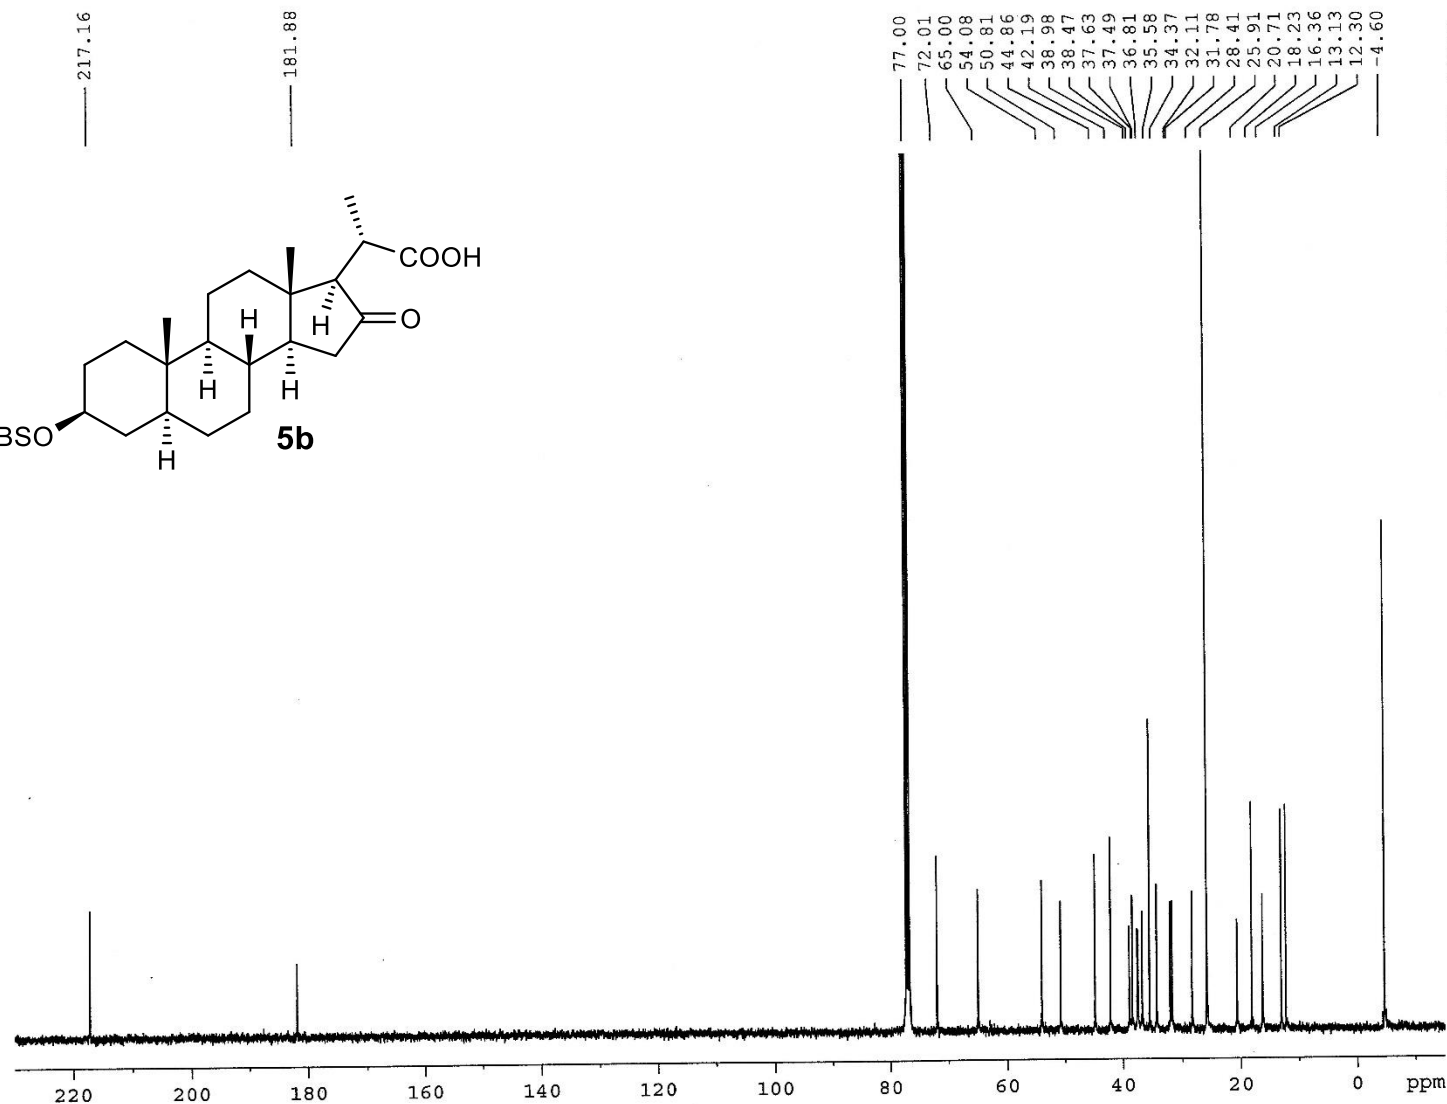

Current Data Parameters  
 NAME DP 30TBS-oksokwas  
 EXPNO 2  
 PROCNO 1

F2 - Acquisition Parameters  
 Date 20200111  
 Time 16.44  
 INSTRUM spect  
 PROBHD 5 mm PABBO BB-  
 PULPROG zgpg30  
 TD 65536  
 SOLVENT CDCl3  
 NS 1920  
 DS 4  
 SWH 32051.281 Hz  
 FIDRES 0.489064 Hz  
 AQ 1.0224116 sec  
 RG 2050  
 DW 15.600 usec  
 DE 6.00 usec  
 TE 999.9 K  
 D1 2.00000000 sec  
 d11 0.03000000 sec  
 DELTA 1.89999998 sec  
 TD0 1

===== CHANNEL f1 =====  
 NUC1 13C  
 P1 27.50 usec  
 PL1 -1.00 dB  
 SFO1 100.6298721 MHz

===== CHANNEL f2 =====  
 CPDPRG2 waltz16  
 NUC2 1H  
 PCPD2 100.00 usec  
 PL2 -3.00 dB  
 PL12 13.65 dB  
 PL13 18.00 dB  
 SFO2 400.1516006 MHz

F2 - Processing parameters  
 SI 32768  
 SF 100.6178015 MHz  
 WDW EM  
 SSB 0  
 LB 1.00 Hz  
 GB 0  
 PC 0.20

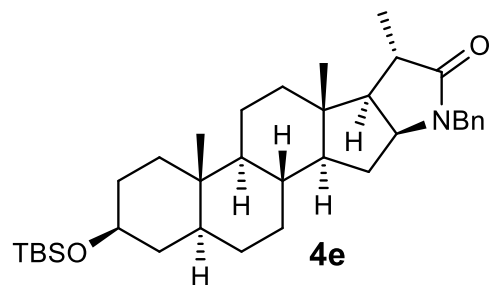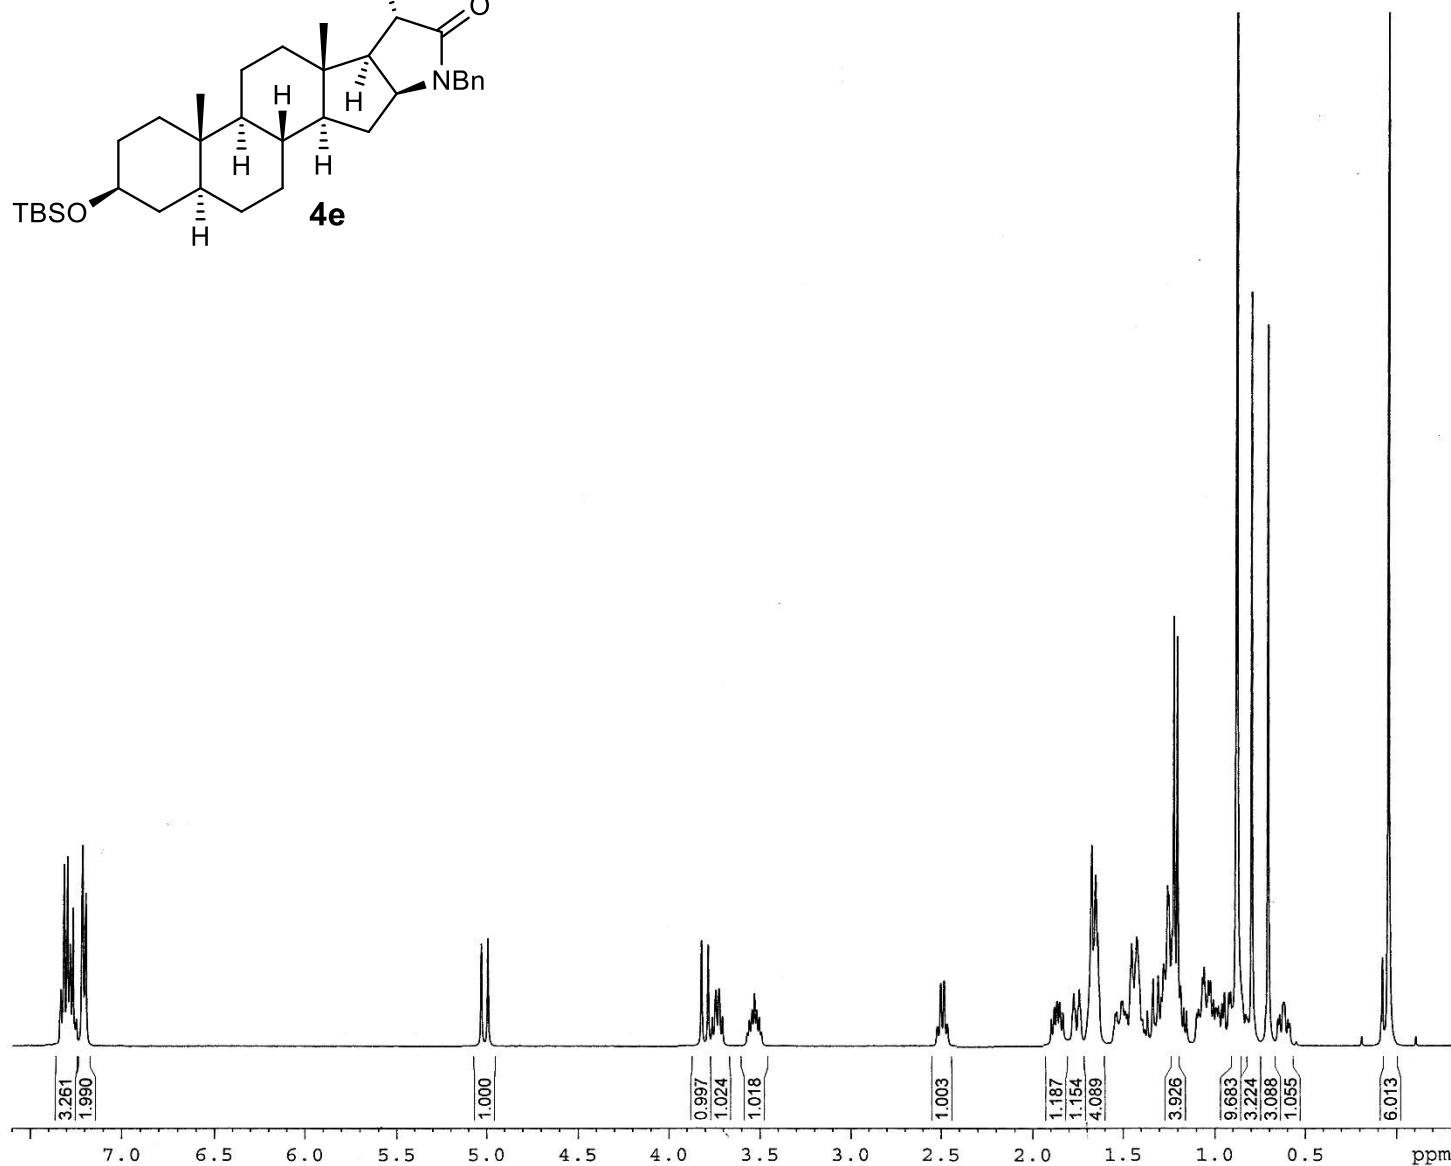

Current Data Parameters  
NAME AB 601D-z3  
EXPNO 1  
PROCNO 1

F2 - Acquisition Parameters  
Date\_ 20200304  
Time\_ 13.46  
INSTRUM spect  
PROBHD 5 mm PABBO BB-  
PULPROG zg30  
TD 65536  
SOLVENT CDCl3  
NS 64  
DS 0  
SWH 8223.685 Hz  
FIDRES 0.125483 Hz  
AQ 3.9846387 sec  
RG 256  
DW 60.800 usec  
DE 8.00 usec  
TE 296.9 K  
D1 1.00000000 sec  
TD0 1

----- CHANNEL f1 -----  
NUC1 1H  
P1 11.15 usec  
PL1 -3.00 dB  
SFO1 400.1524711 MHz

F2 - Processing parameters  
SI 32768  
SF 400.1500008 MHz  
WDW GM  
SSB 0  
LB -0.20 Hz  
GB 0.2  
PC 1.00

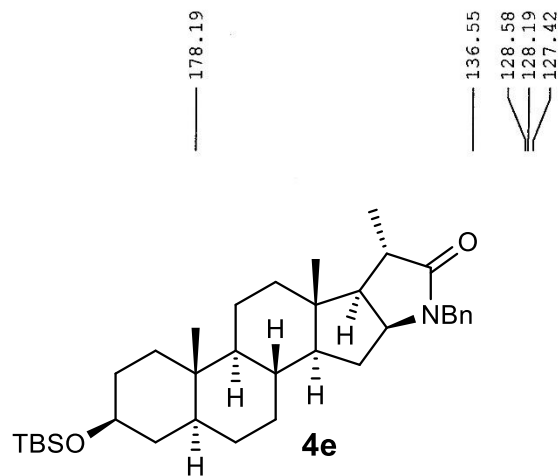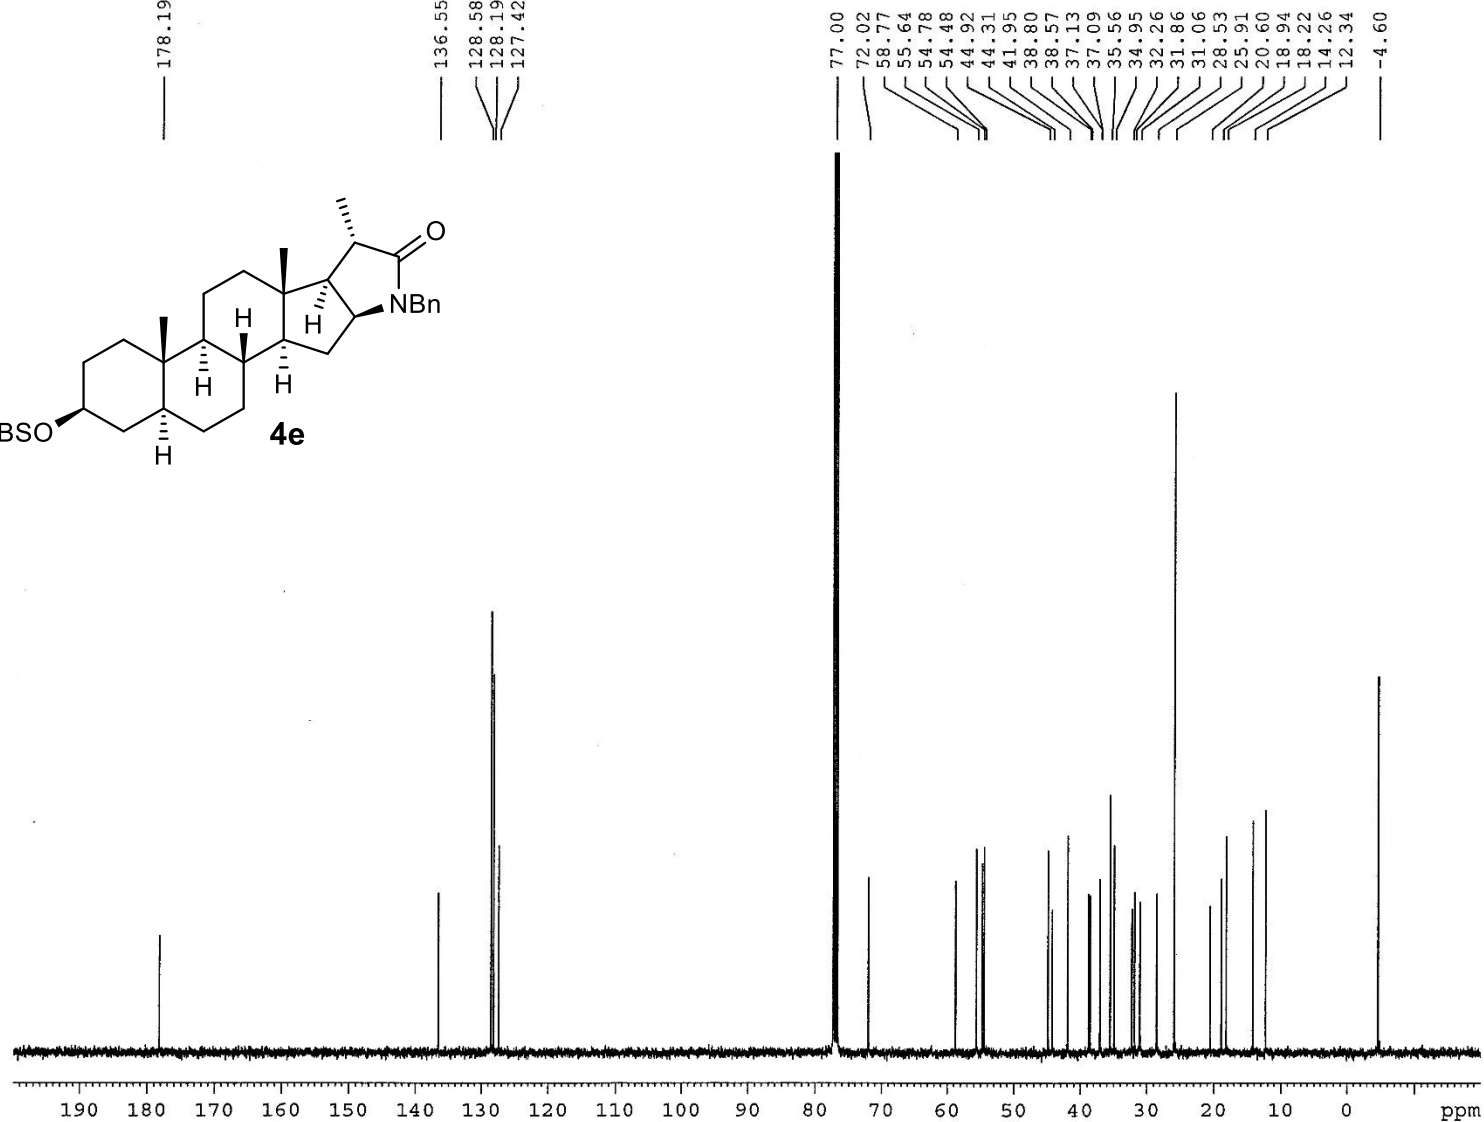

Current Data Parameters  
 NAME AB 601D-23  
 EXPNO 2  
 PROCNO 1

F2 - Acquisition Parameters  
 Date\_ 20200306  
 Time\_ 18.46  
 INSTRUM spect  
 PROBHD 5 mm PABBO BB-  
 PULPROG zgpg30  
 TD 65536  
 SOLVENT CDCl3  
 NS 768  
 DS 4  
 SWH 32051.281 Hz  
 FIDRES 0.489064 Hz  
 AQ 1.0224116 sec  
 RG 2050  
 DW 15.600 usec  
 DE 6.00 usec  
 TE 297.0 K  
 D1 2.00000000 sec  
 d11 0.03000000 sec  
 DELTA 1.89999998 sec  
 TD0 1

===== CHANNEL f1 =====  
 NUC1 13C  
 P1 27.50 usec  
 PL1 -1.00 dB  
 SFO1 100.6298721 MHz

===== CHANNEL f2 =====  
 CPDPRG2 waltz16  
 NUC2 1H  
 PCPD2 100.00 usec  
 PL2 -3.00 dB  
 PL12 13.65 dB  
 PL13 18.00 dB  
 SFO2 400.1516006 MHz

F2 - Processing parameters  
 SI 32768  
 SF 100.6178015 MHz  
 WDW EM  
 SSB 0  
 LB 1.00 Hz  
 GB 0  
 PC 1.40

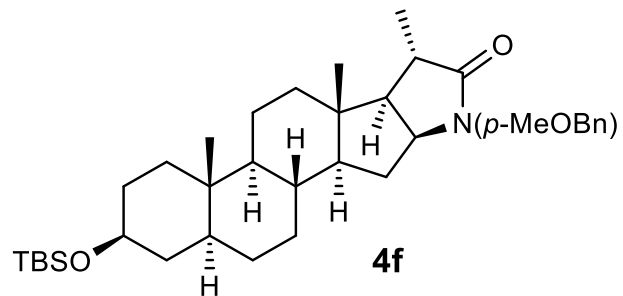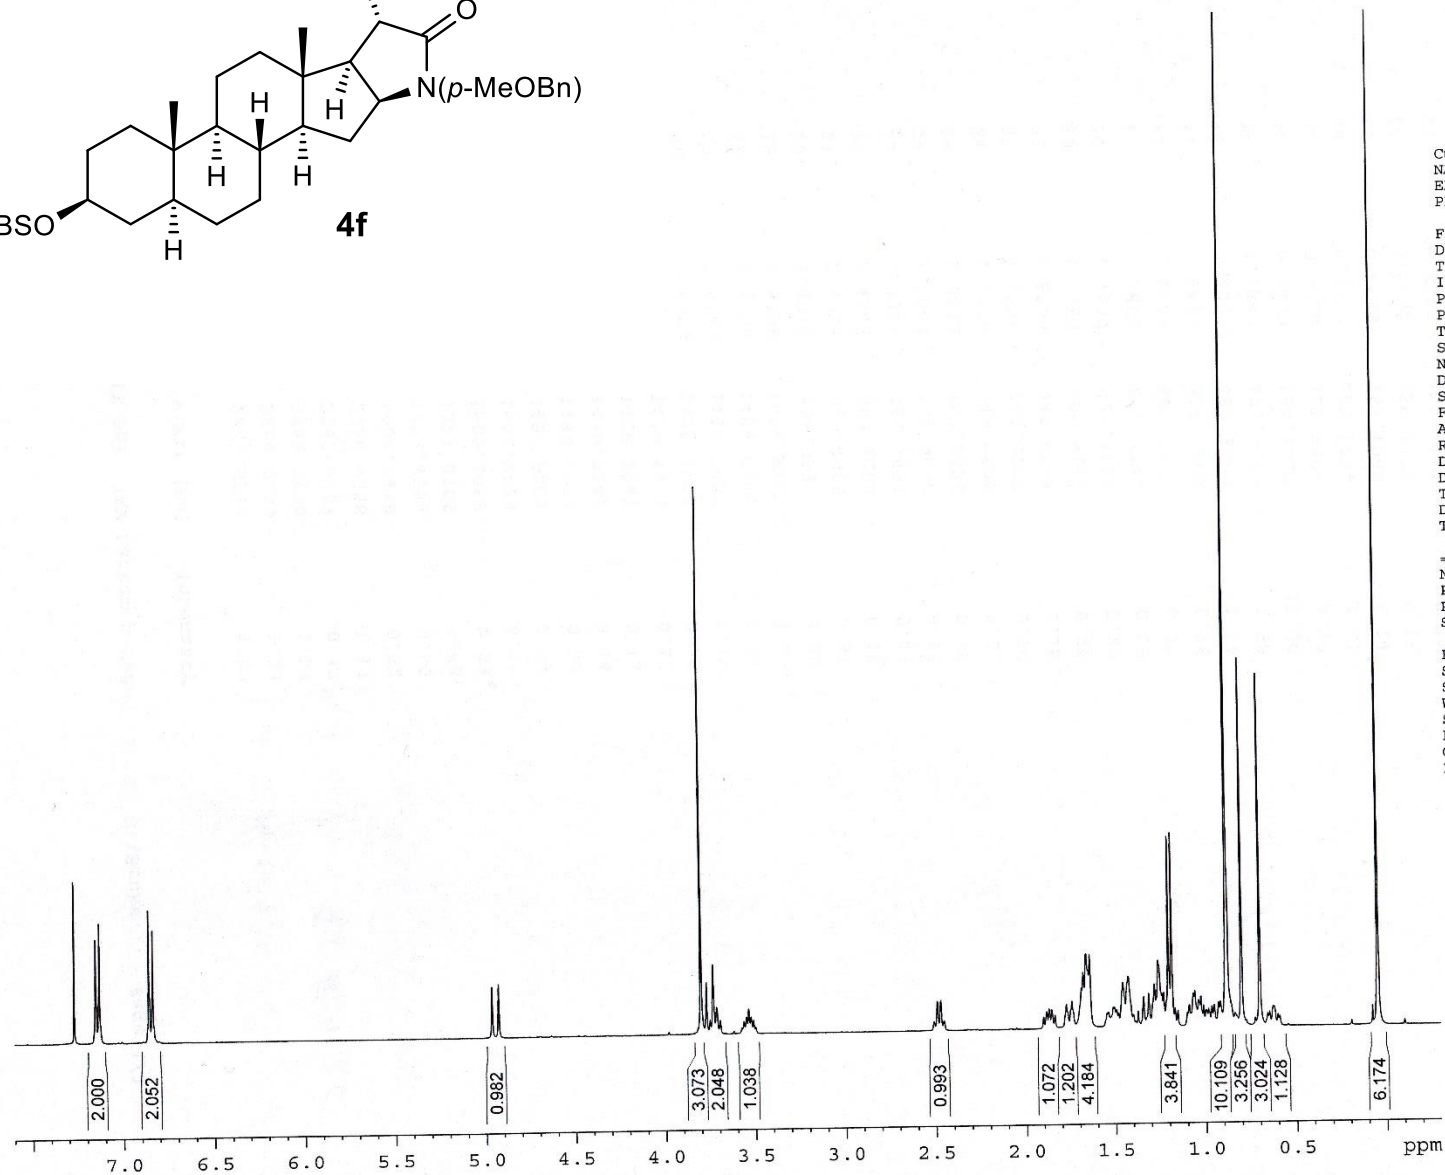

Current Data Parameters  
 NAME AW Lactam p-MeBn  
 EXPNO 1  
 PROCNO 1

F2 - Acquisition Parameters  
 Date\_ 20200327  
 Time 11.54  
 INSTRUM spect  
 PROBHD 5 mm PABBO BB-  
 PULPROG zg30  
 TD 65536  
 SOLVENT CDCl3  
 NS 128  
 DS 0  
 SWH 8223.685 Hz  
 FIDRES 0.125483 Hz  
 AQ 3.9846387 sec  
 RG 161  
 DW 60.800 usec  
 DE 8.00 usec  
 TE 999.9 K  
 D1 1.00000000 sec  
 TD0 1

===== CHANNEL f1 =====  
 NUC1 1H  
 P1 11.15 usec  
 PL1 -3.00 dB  
 SFO1 400.1524711 MHz

F2 - Processing parameters  
 SI 32768  
 SF 400.1500000 MHz  
 WDW GM  
 SSB 0  
 LB -0.20 Hz  
 GB 0.2  
 PC 1.00

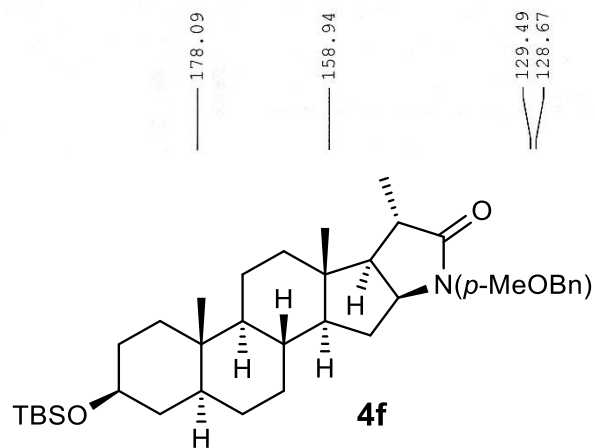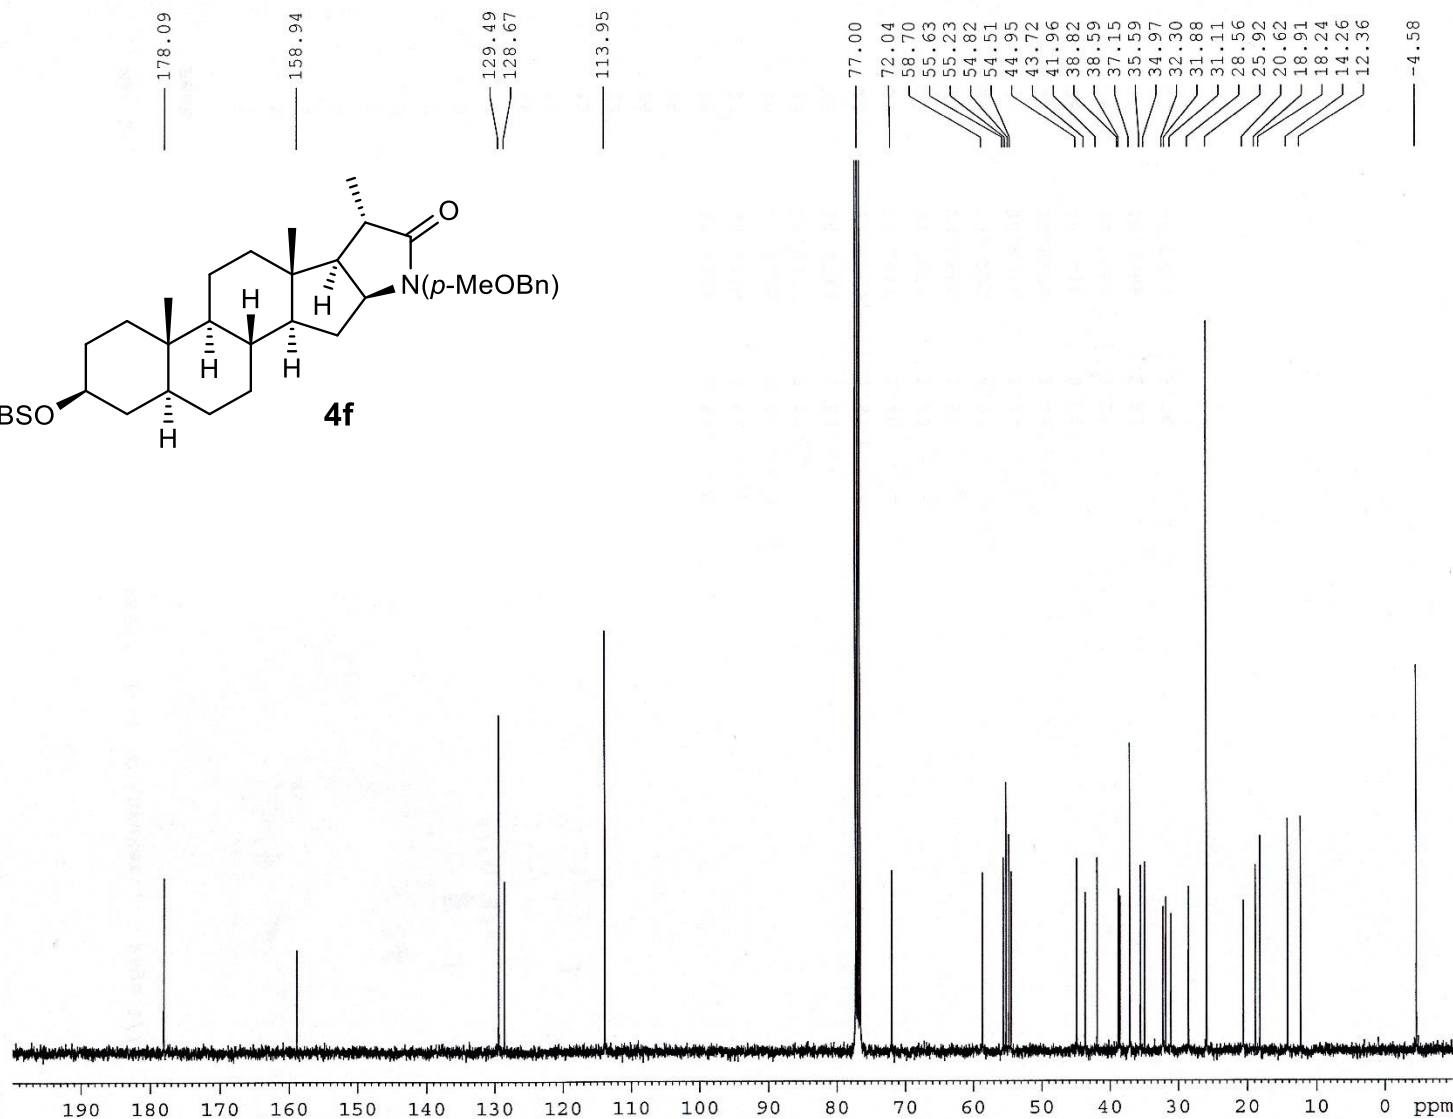

Current Data Parameters  
 NAME AW Lactam p-MeBn  
 EXPNO 2  
 PROCNO 1

F2 - Acquisition Parameters  
 Date\_ 20200327  
 Time 12.30  
 INSTRUM spect  
 PROBHD 5 mm PABBO BB-  
 PULPROG zgpg30  
 TD 65536  
 SOLVENT CDCl3  
 NS 2240  
 DS 4  
 SWH 32051.281 Hz  
 FIDRES 0.489064 Hz  
 AQ 1.0224116 sec  
 RG 2050  
 DW 15.600 usec  
 DE 6.00 usec  
 TE 999.9 K  
 D1 2.00000000 sec  
 d11 0.03000000 sec  
 DELTA 1.89999998 sec  
 TDO 1

===== CHANNEL f1 =====  
 NUC1 13C  
 P1 27.50 usec  
 PL1 -1.00 dB  
 SFO1 100.6298721 MHz

===== CHANNEL f2 =====  
 CPDPRG2 waltz16  
 NUC2 1H  
 PCPD2 100.00 usec  
 PL2 -3.00 dB  
 PL12 13.65 dB  
 PL13 18.00 dB  
 SFO2 400.1516006 MHz

F2 - Processing parameters  
 SI 32768  
 SF 100.6177997 MHz  
 WDW EM  
 SSB 0  
 LB 1.00 Hz  
 GB 0  
 PC 0.20
